# Supplementary material for: Chiral phosphine-squaramide-catalyzed Morita–Baylis–Hillman reaction: enantioselective synthesis of 3-hydroxy-2-oxindoles
Source: Royal Society of Chemistry journal article supplement (doi:10.1039/c2ra20521a), 2012-01-01
Supplement: c2ra20521a.pdf [file c2ra20521a.pdf]

## Supporting Information

### Chiral phosphine-squaramide-catalyzed Morita-Baylis-Hillman reaction: Enantioselective synthesis of 3-hydroxy-2-oxindoles

Jing-Ying Qian,<sup>a</sup> Ci-Ci Wang,<sup>a</sup> Feng Sha<sup>a</sup> and Xin-Yan Wu<sup>\*a,b</sup>

<sup>a</sup>*Key Laboratory for Advanced Materials and Institute of Fine Chemicals, East China University of Science and Technology, Shanghai 200237, P. R. China*

<sup>b</sup>*State Key Laboratory of elemento-organic Chemistry, Nankai University, Tianjin 300071, P. R. China*

E-mail: xinyanwu@ecust.edu.cn; Tel: 86 21 64252011; Fax: 86 21 64252758

|                                                                                                    |     |
|----------------------------------------------------------------------------------------------------|-----|
| 1. <sup>1</sup> H NMR, <sup>13</sup> C NMR and <sup>31</sup> P NMR Spectra of Catalyst <b>3a-h</b> | S2  |
| 2. HPLC Spectra for the Morita-Baylis-Hillman Products                                             | S13 |
| 3. Absolute Configuration and X-Ray Analysis Data of <b>6m</b>                                     | S31 |

# 1. $^1\text{H}$ NMR, $^{13}\text{C}$ NMR and $^{31}\text{P}$ NMR Spectra of Catalyst 3a-h

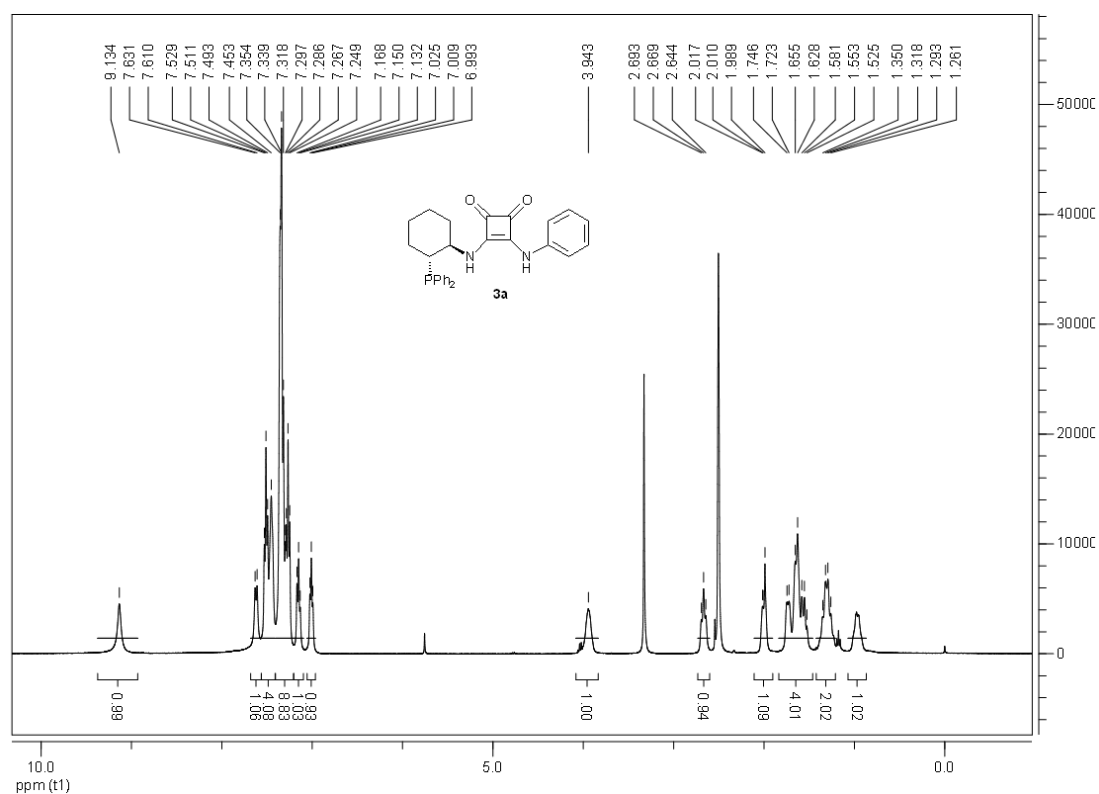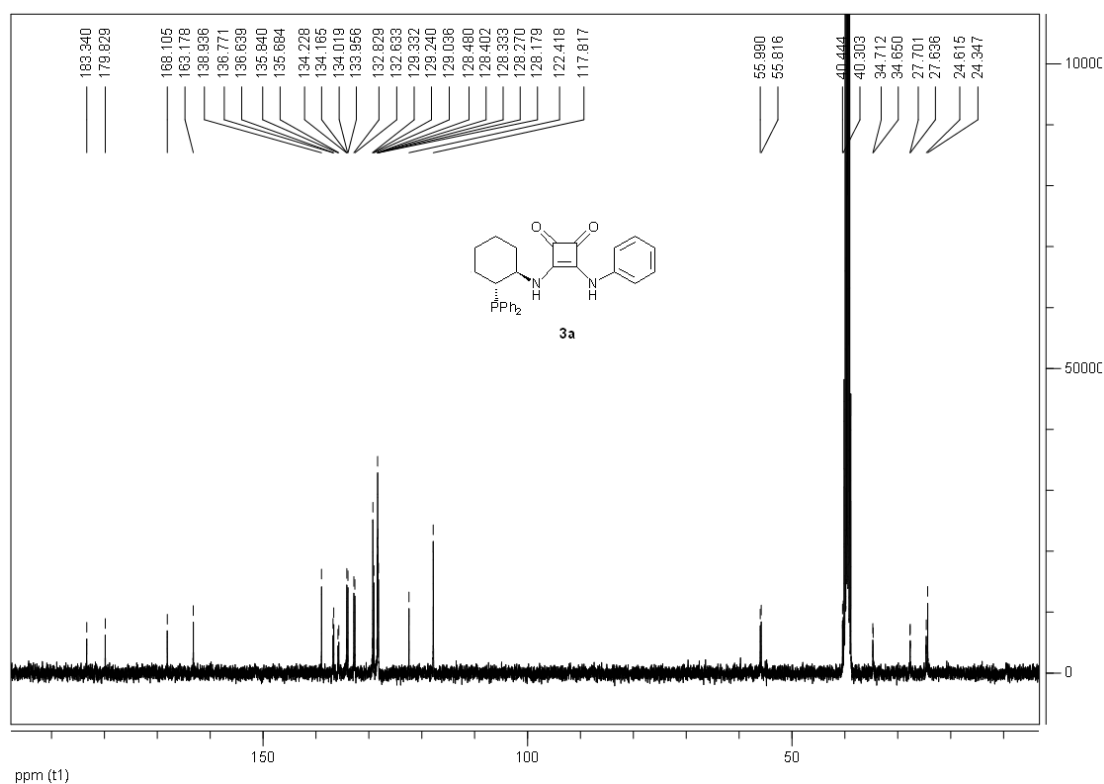

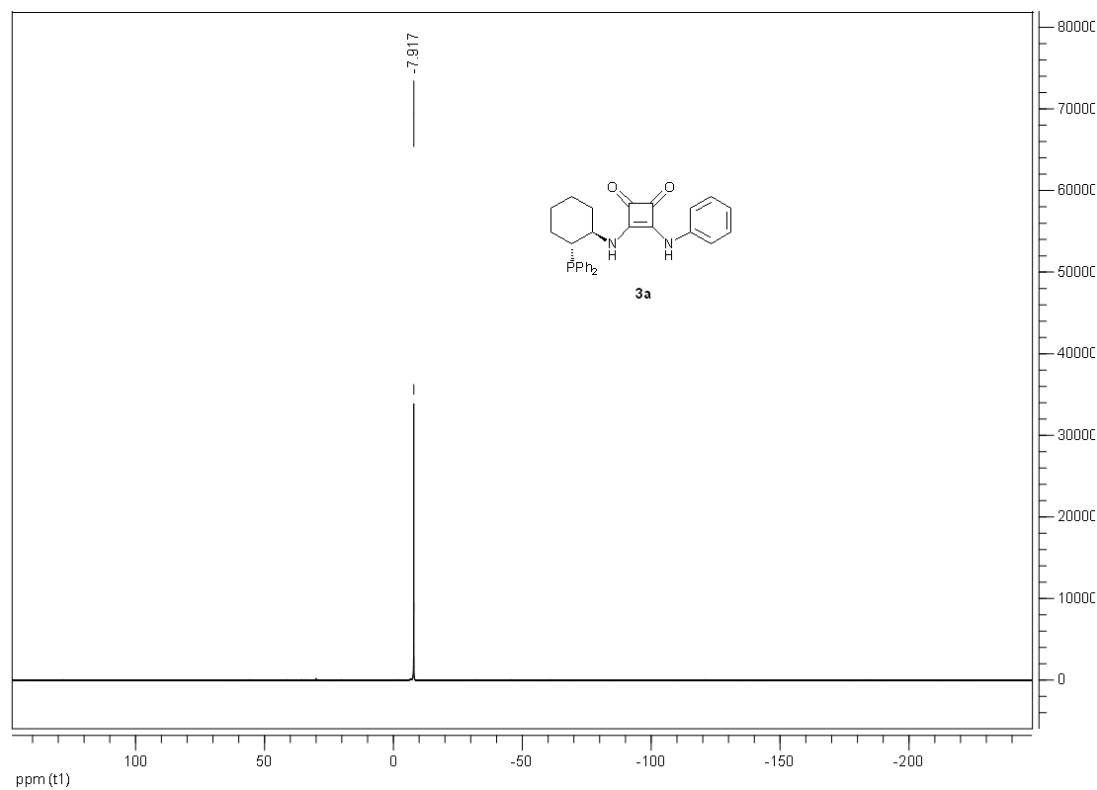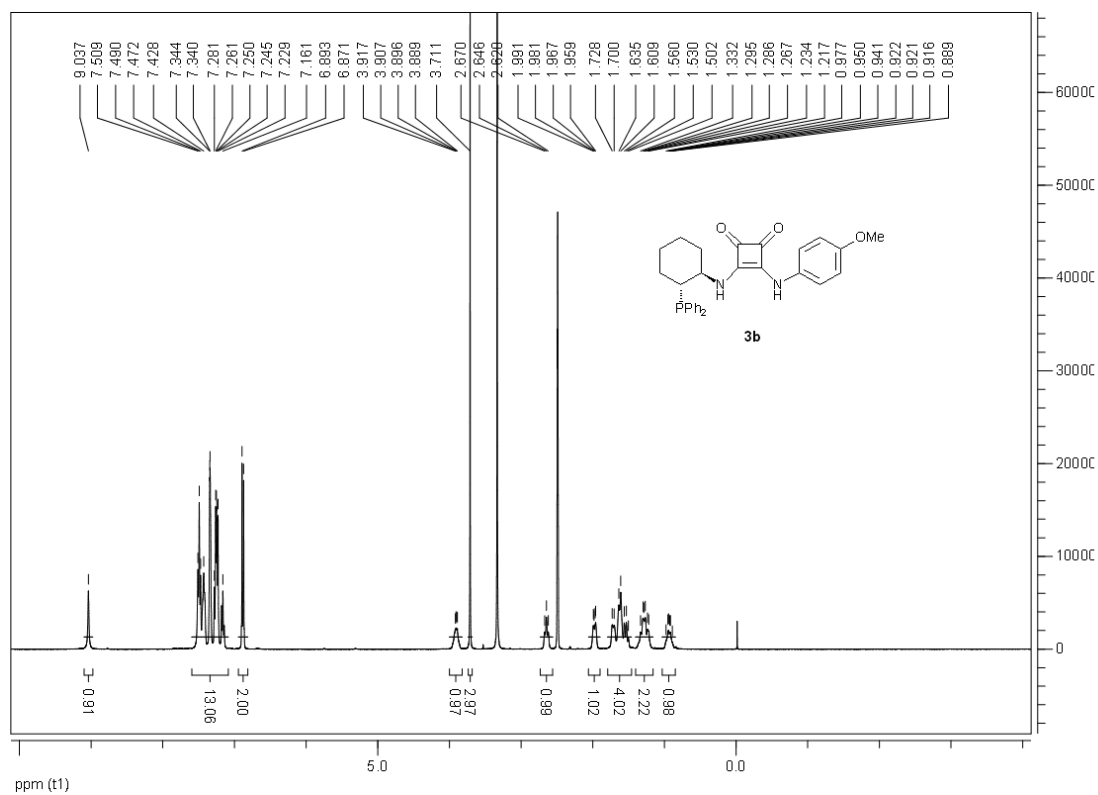

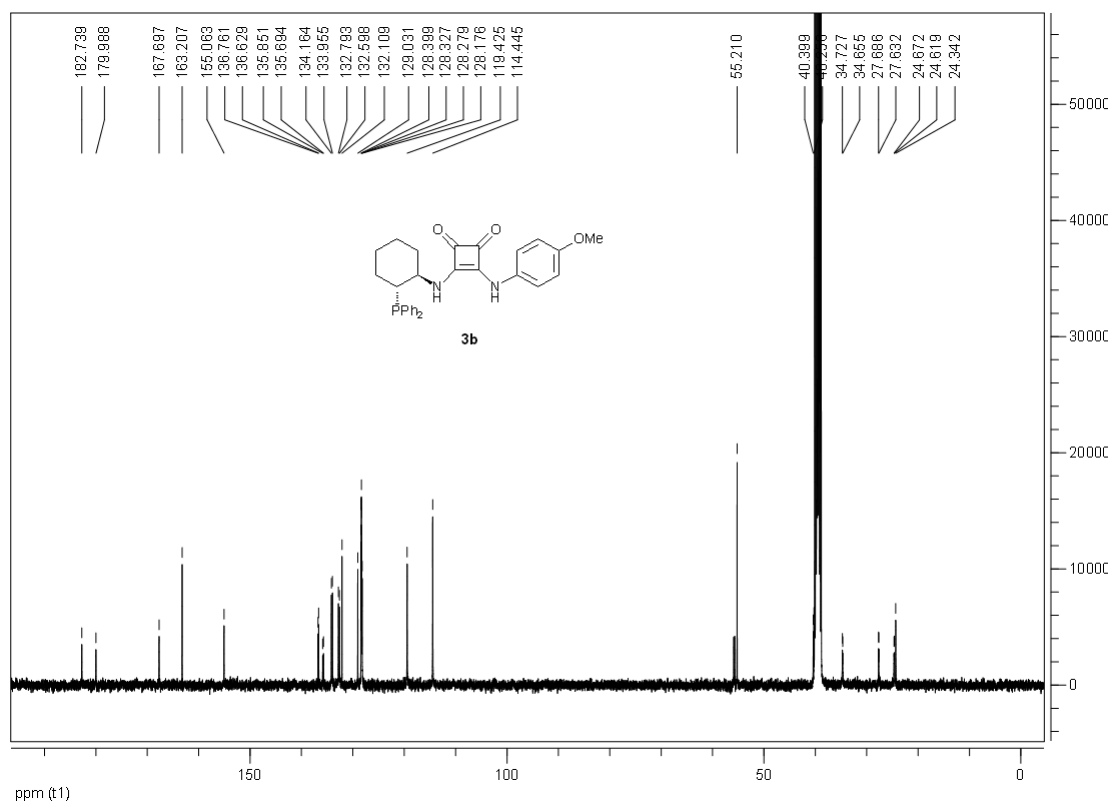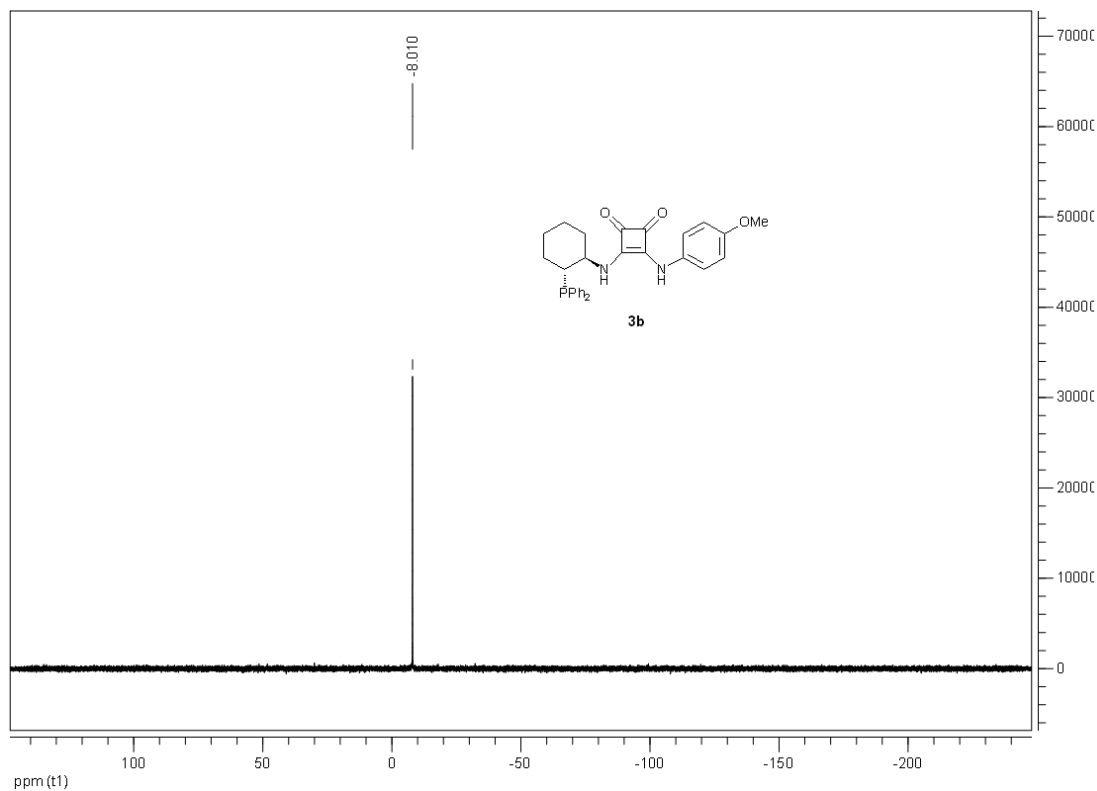

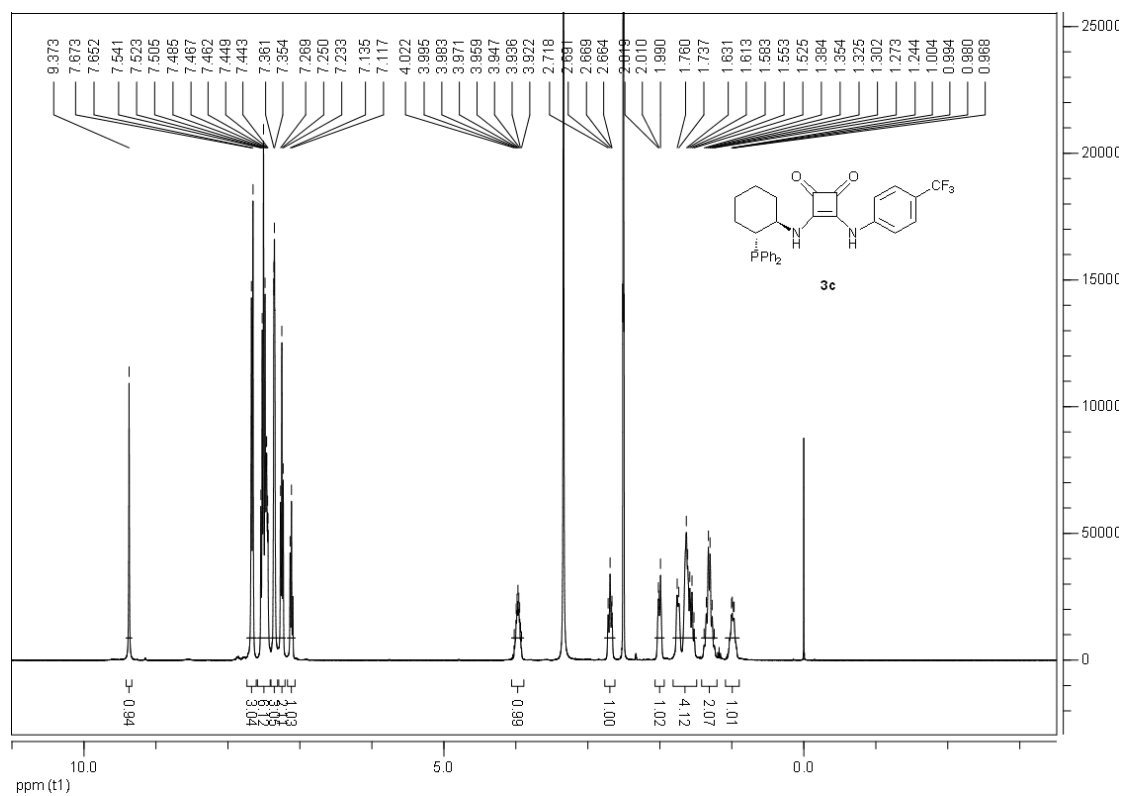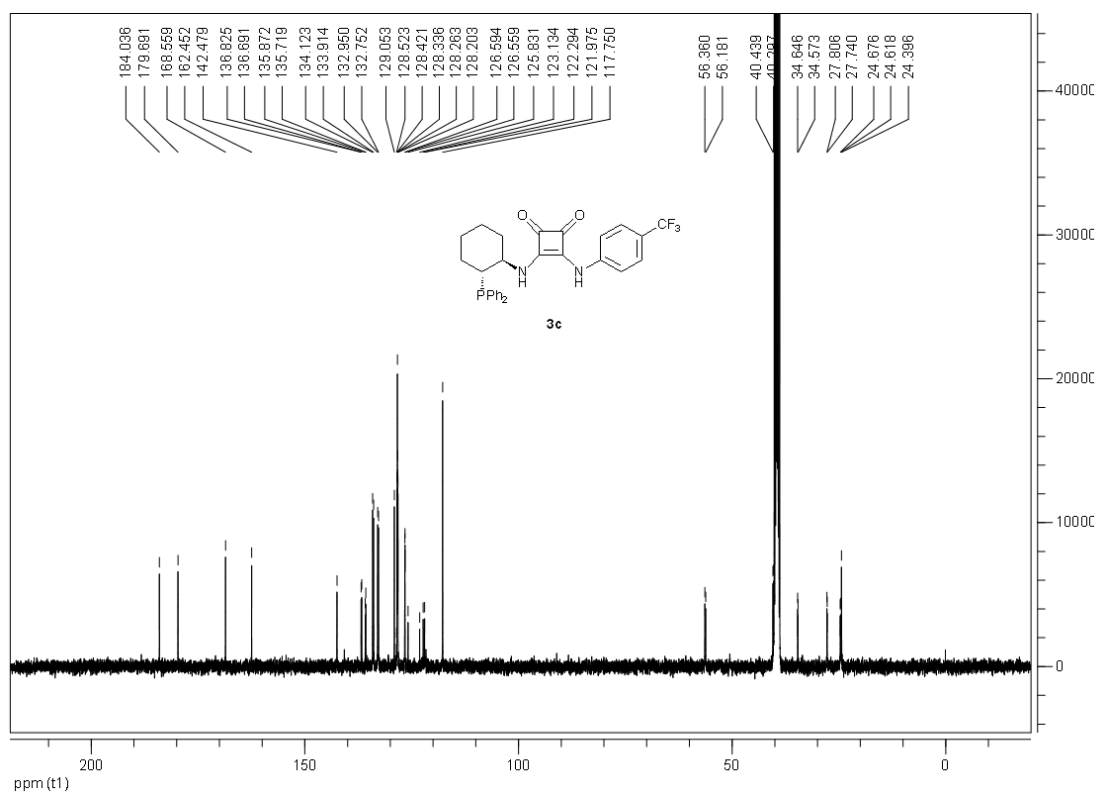

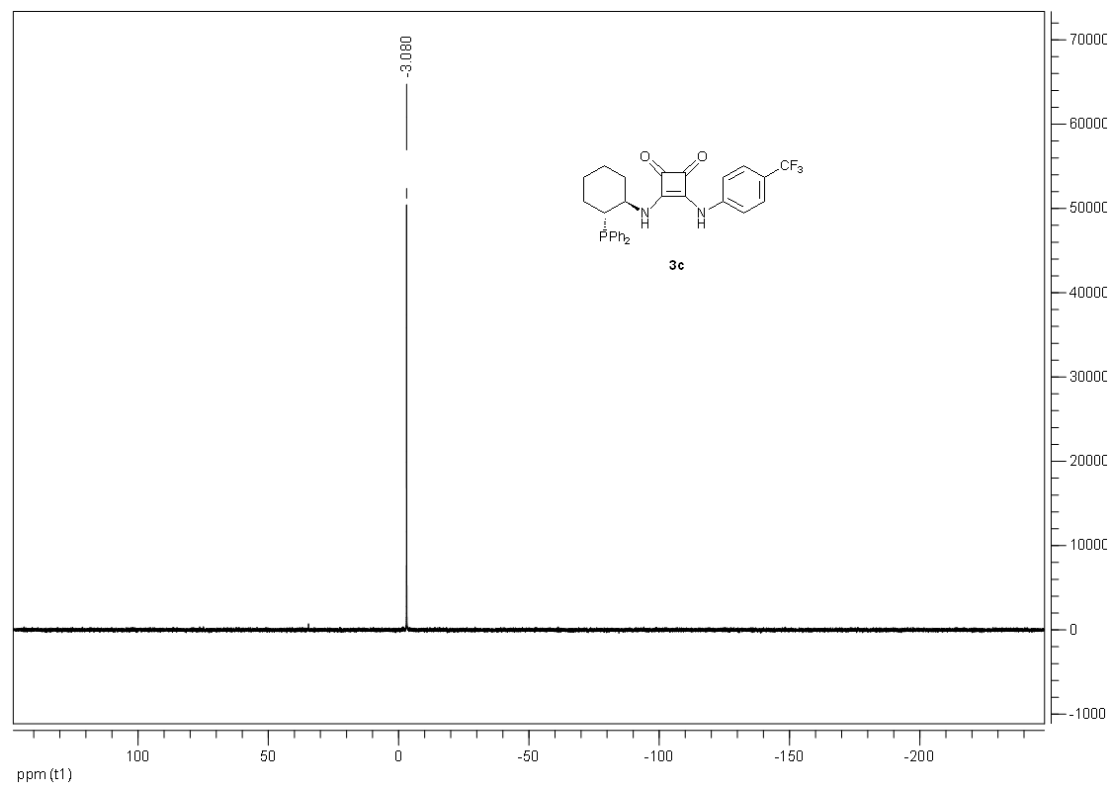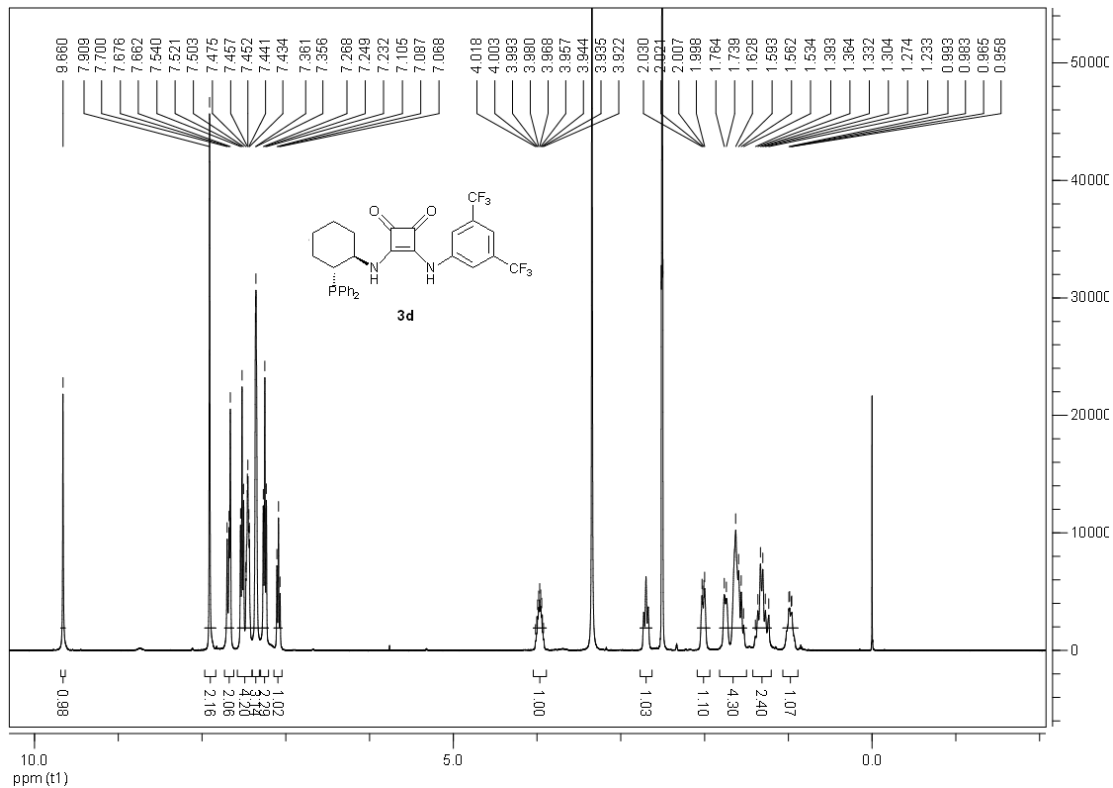

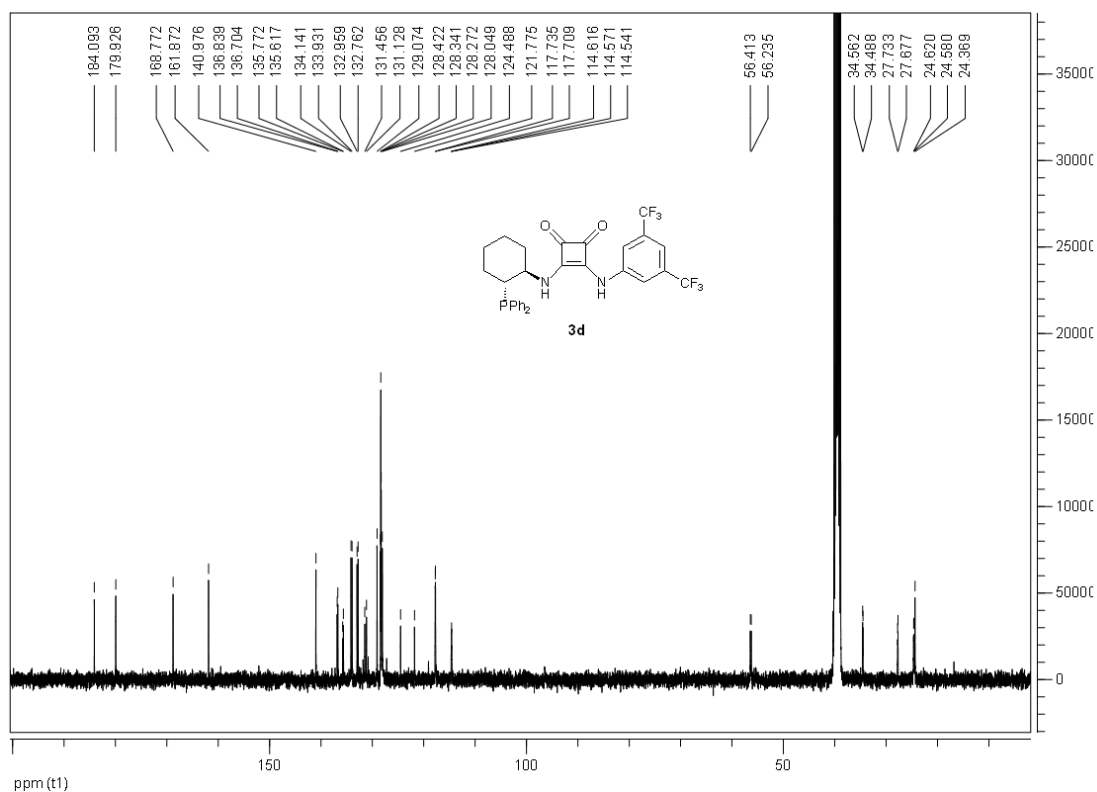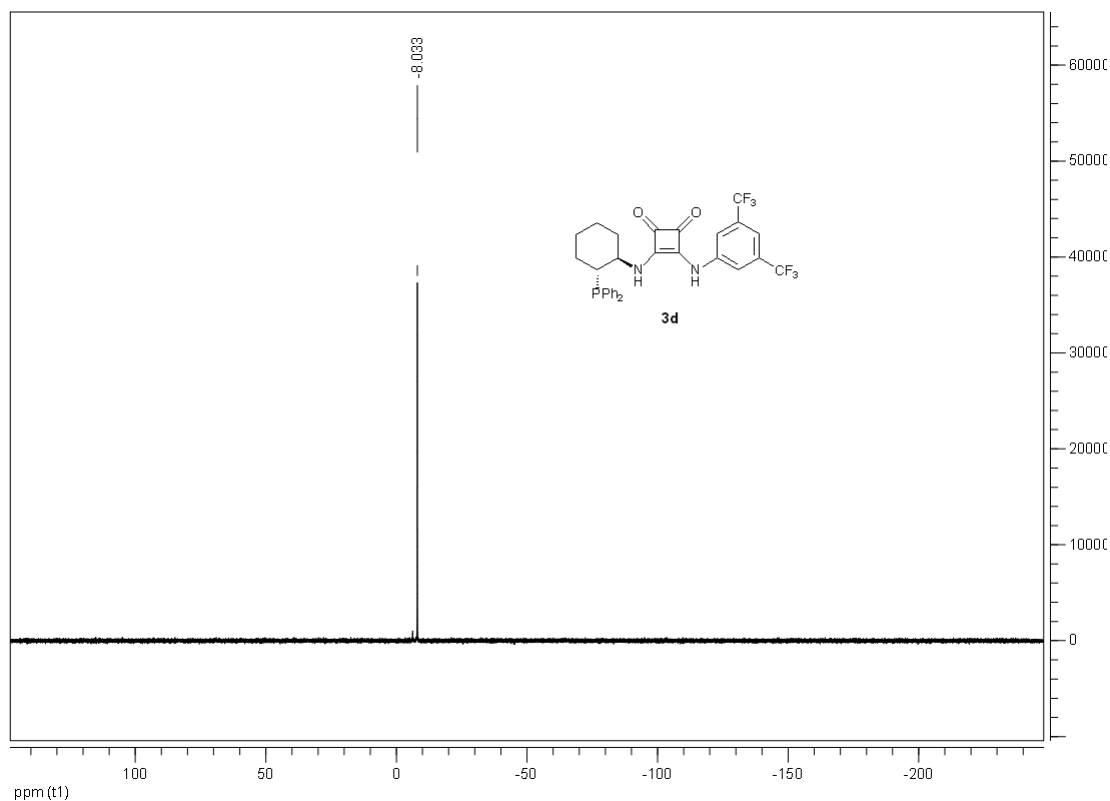

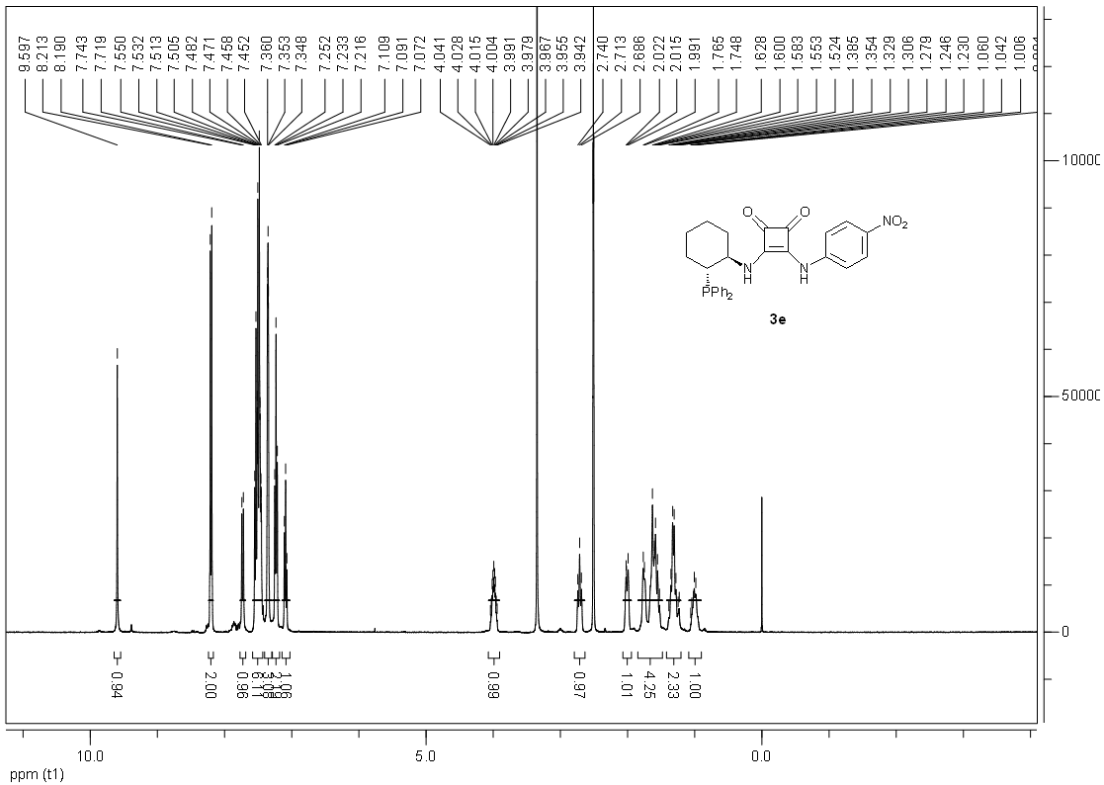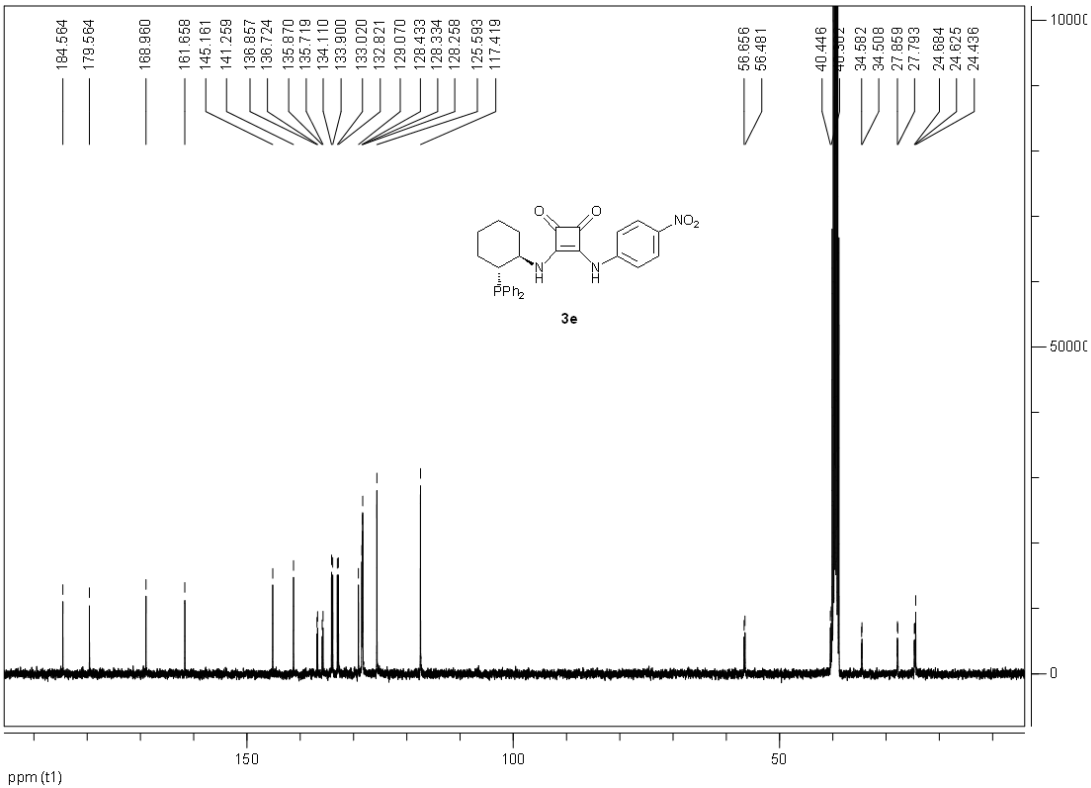



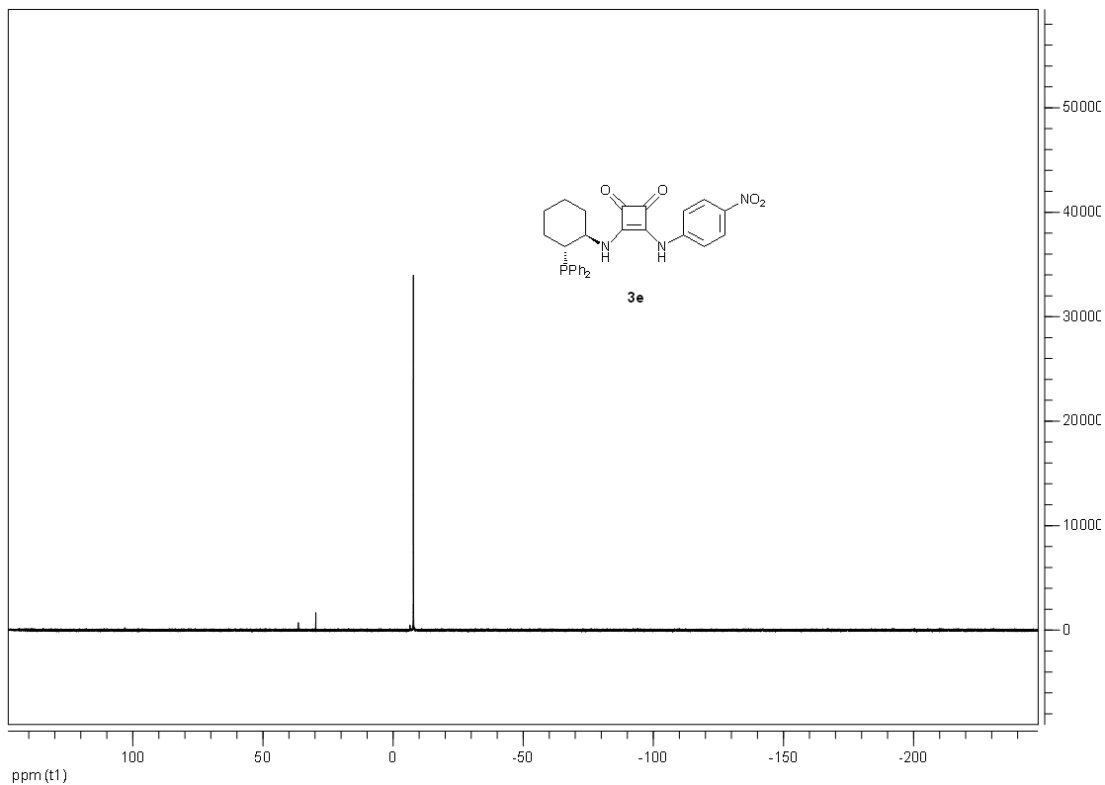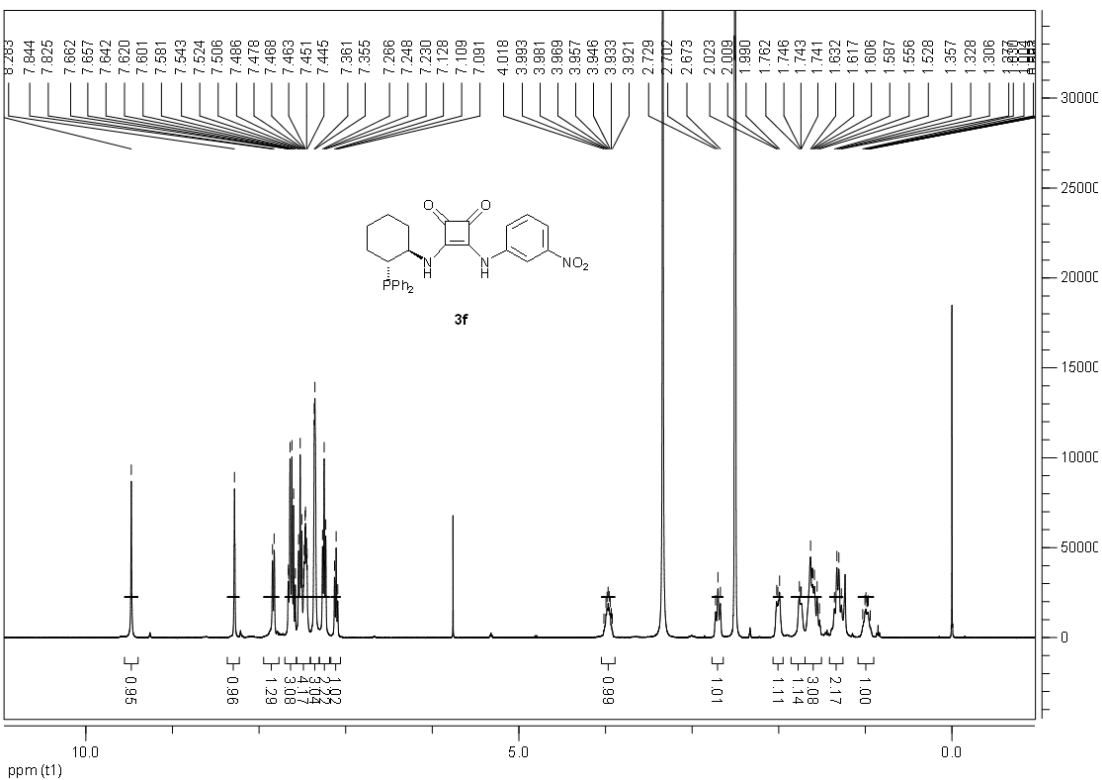

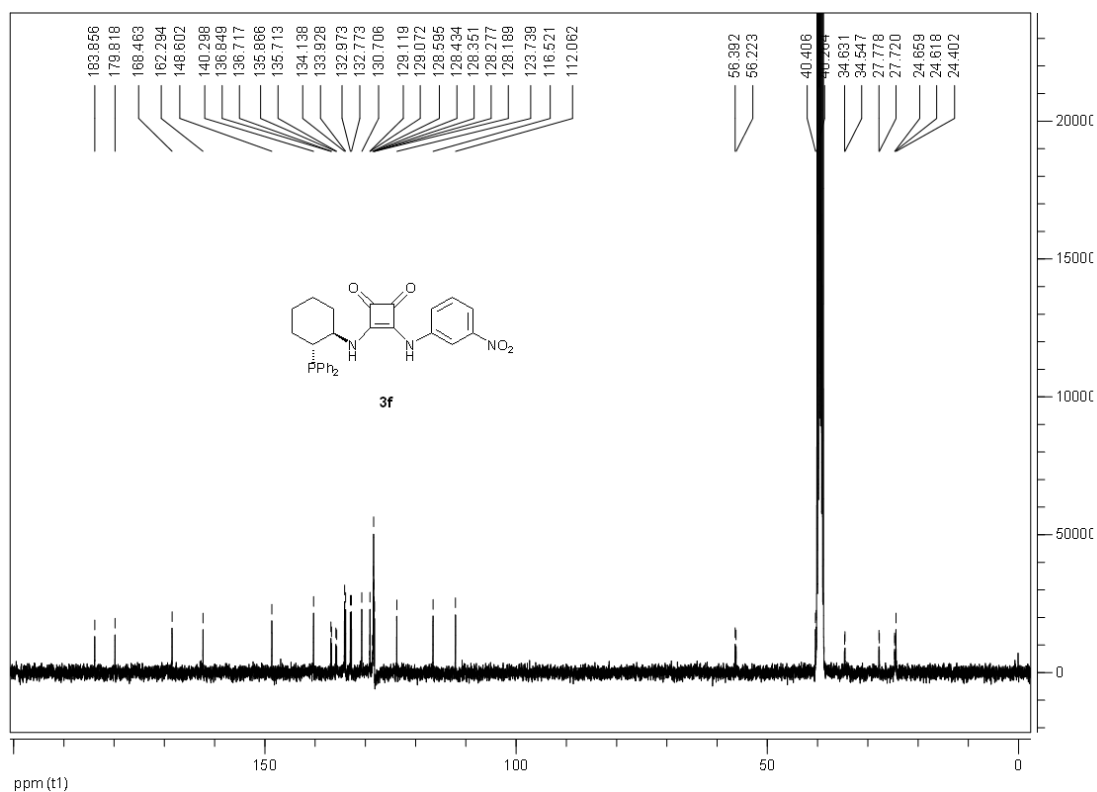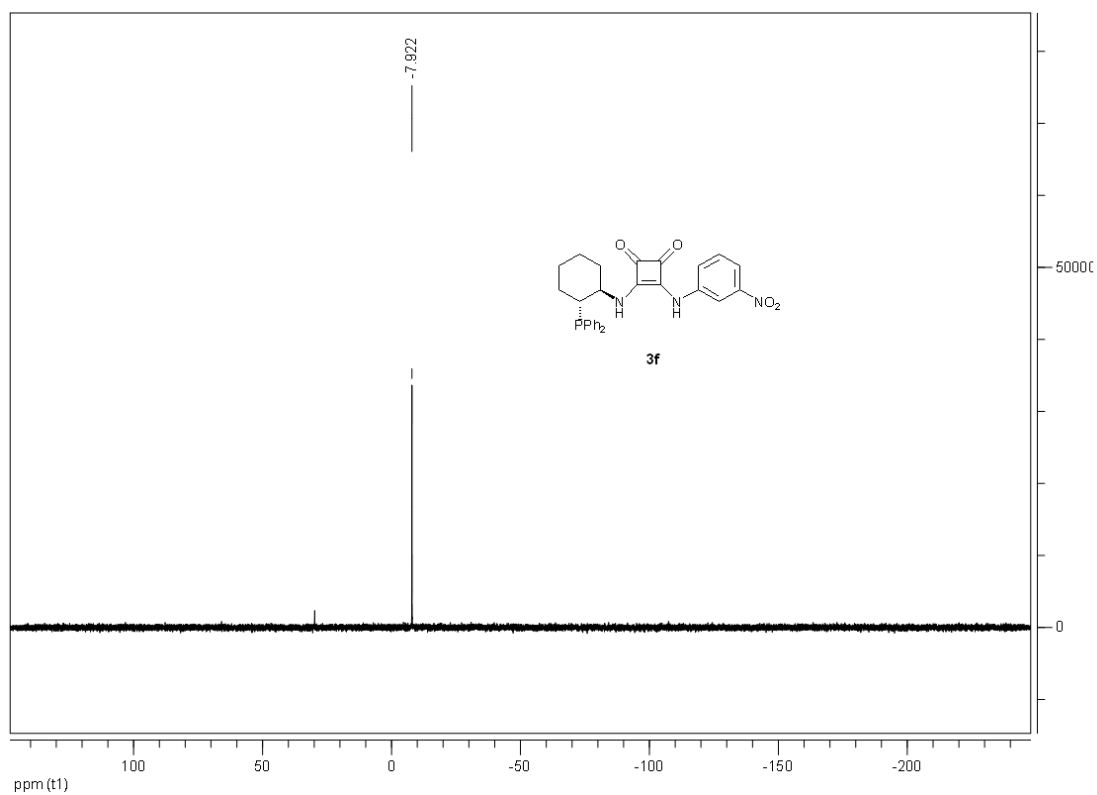

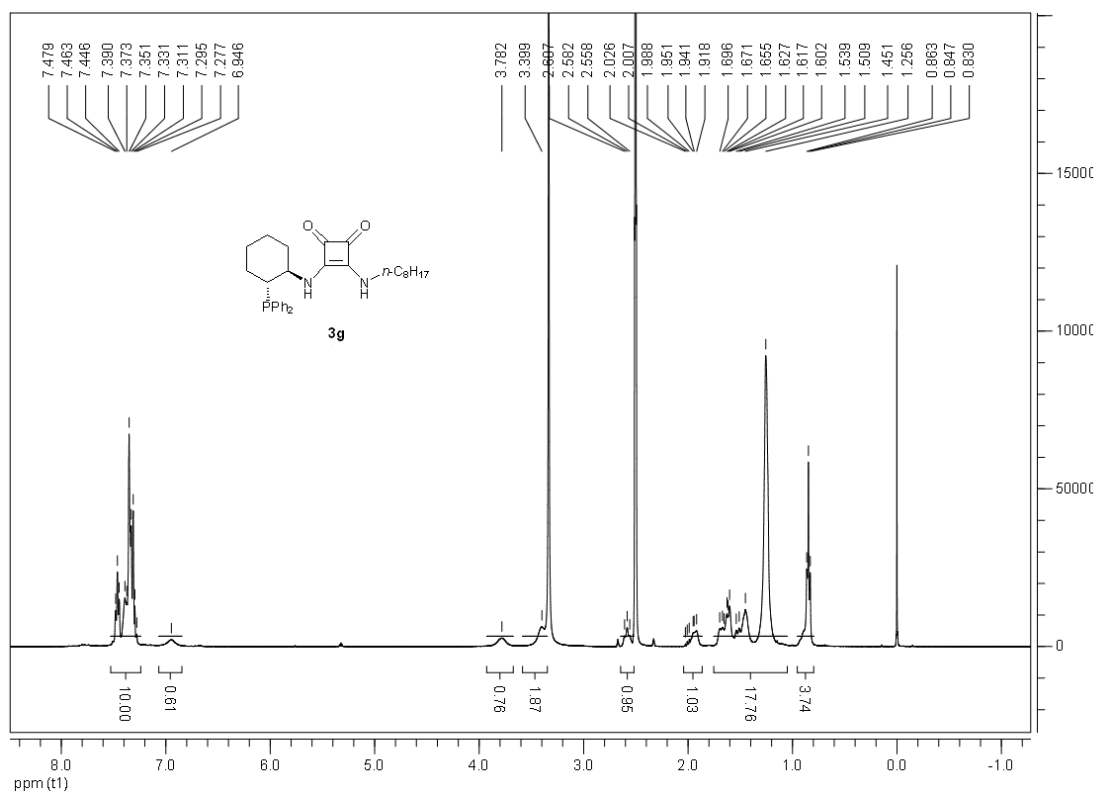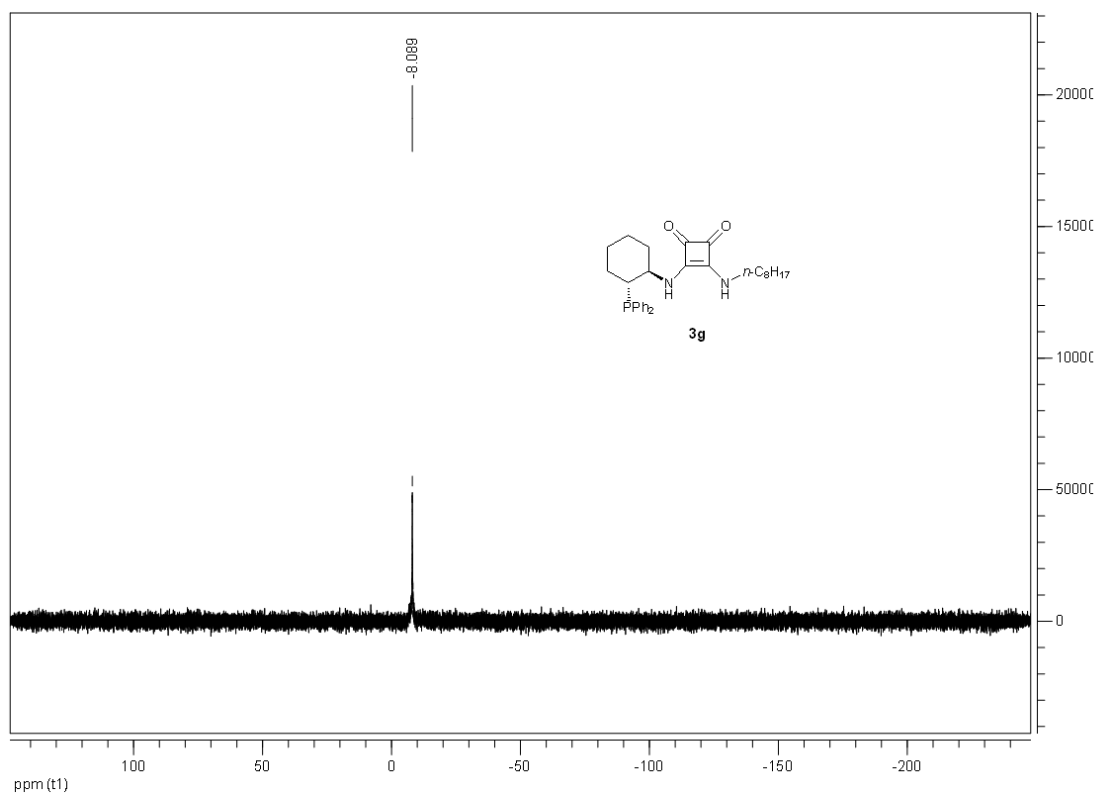

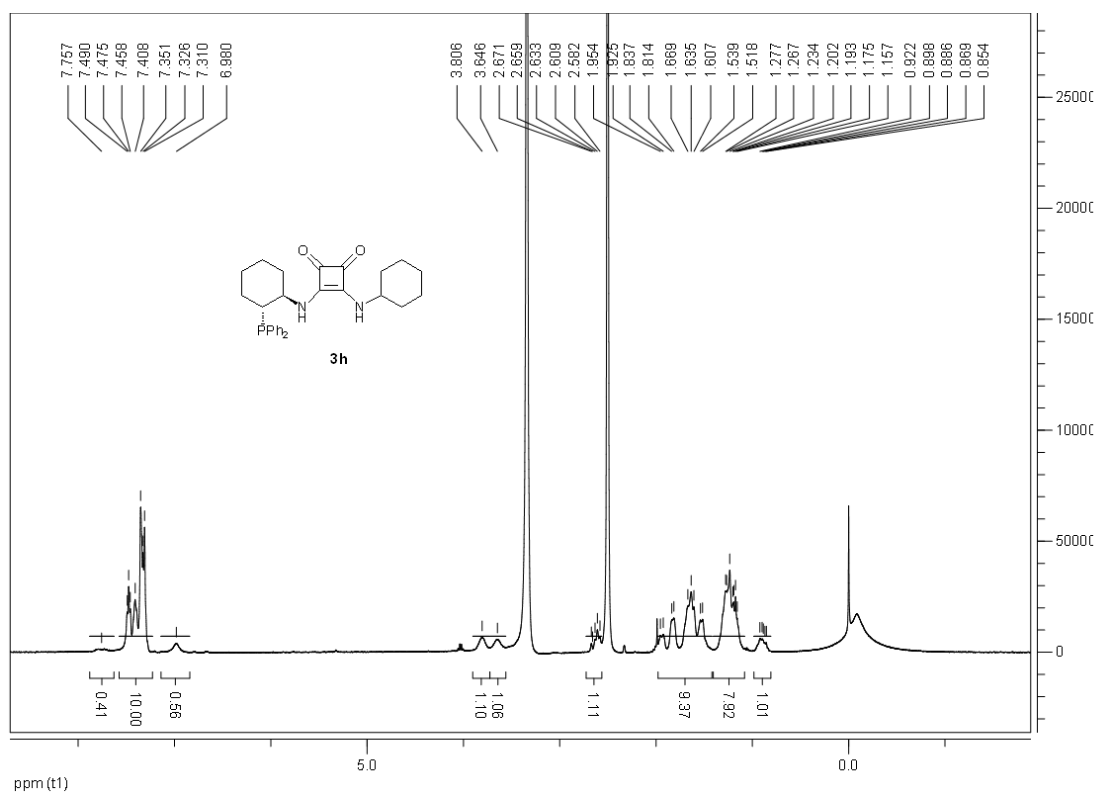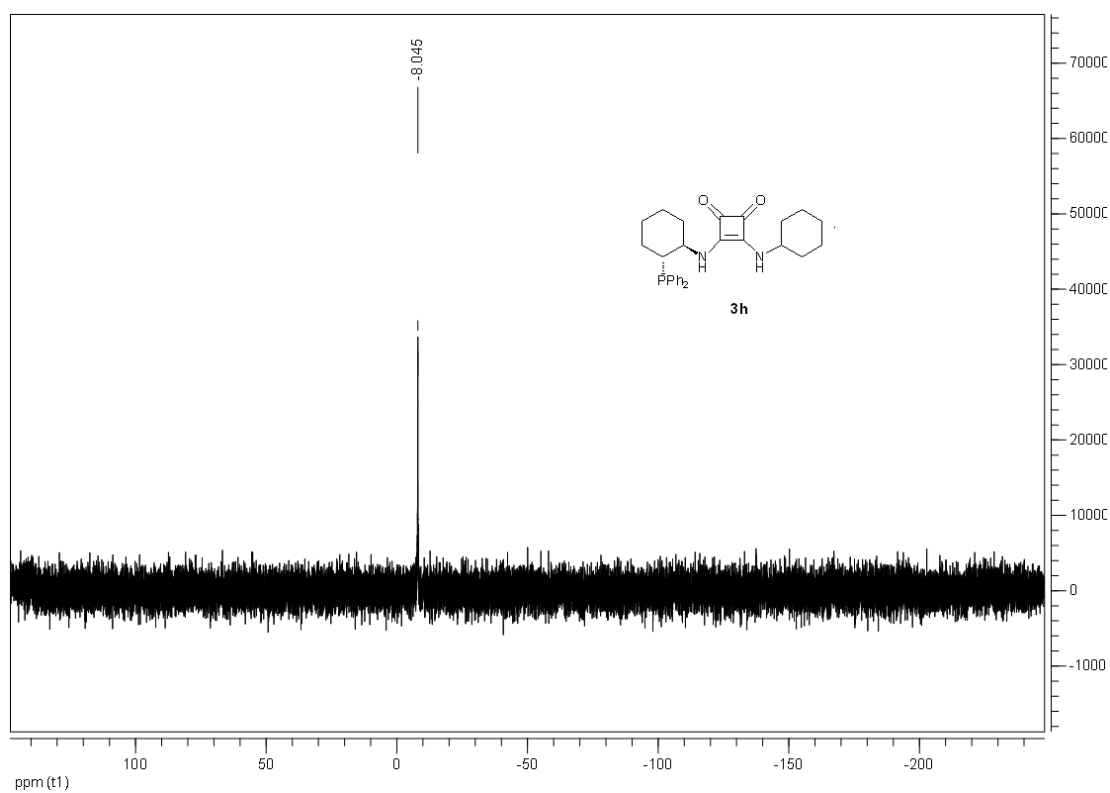

2. HPLC Spectra for the Morita-Baylis-Hillman Products

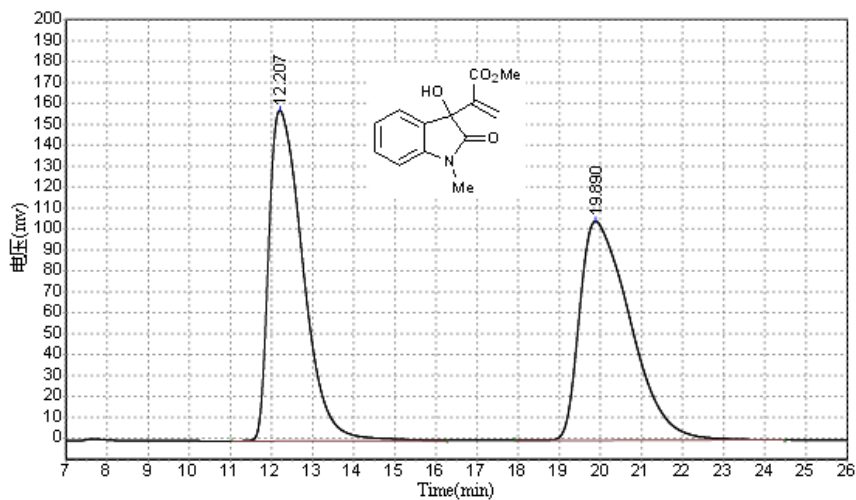

| Results  |         |          |            |              |          |
|----------|---------|----------|------------|--------------|----------|
| Peak No. | Peak ID | Ret Time | Height     | Area         | Conc.    |
| 1        |         | 12.207   | 157978.578 | 9127587.000  | 50.3639  |
| 2        |         | 19.890   | 104714.586 | 8995686.000  | 49.6361  |
| Total    |         |          | 262693.164 | 18123273.000 | 100.0000 |

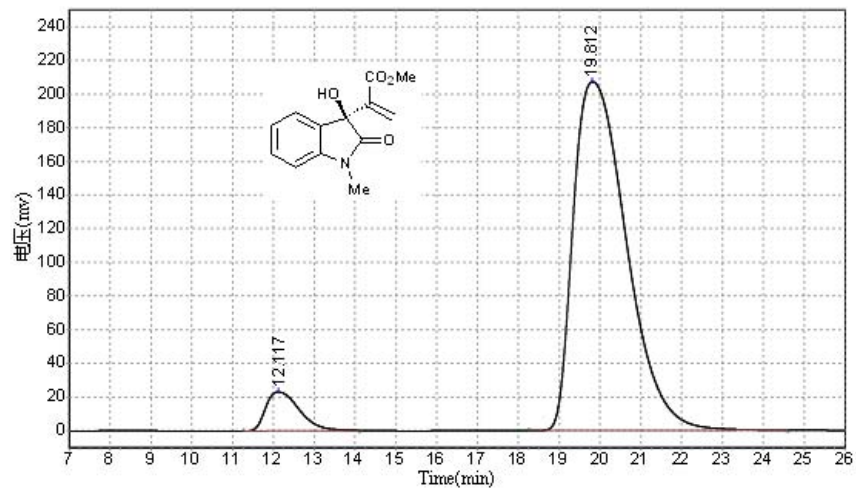

| Results  |         |          |            |              |          |
|----------|---------|----------|------------|--------------|----------|
| Peak No. | Peak ID | Ret Time | Height     | Area         | Conc.    |
| 1        |         | 12.117   | 23179.410  | 1326025.500  | 6.6089   |
| 2        |         | 19.812   | 207192.641 | 18738218.000 | 93.3911  |
| Total    |         |          | 230372.051 | 20064243.500 | 100.0000 |

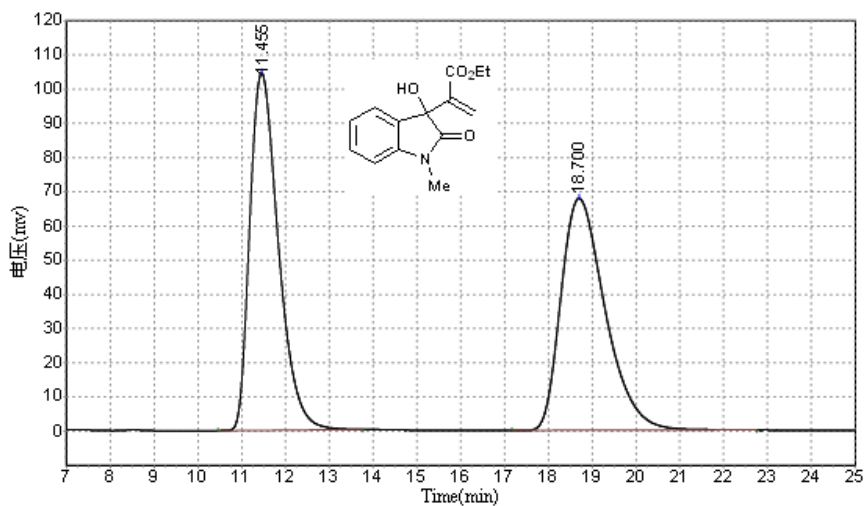

| Results  |         |          |            |             |          |
|----------|---------|----------|------------|-------------|----------|
| Peak No. | Peak ID | Ret Time | Height     | Area        | Conc.    |
| 1        |         | 11.455   | 104512.727 | 4732744.500 | 49.8311  |
| 2        |         | 18.700   | 67888.133  | 4764818.500 | 50.1689  |
| Total    |         |          | 172400.859 | 9497563.000 | 100.0000 |

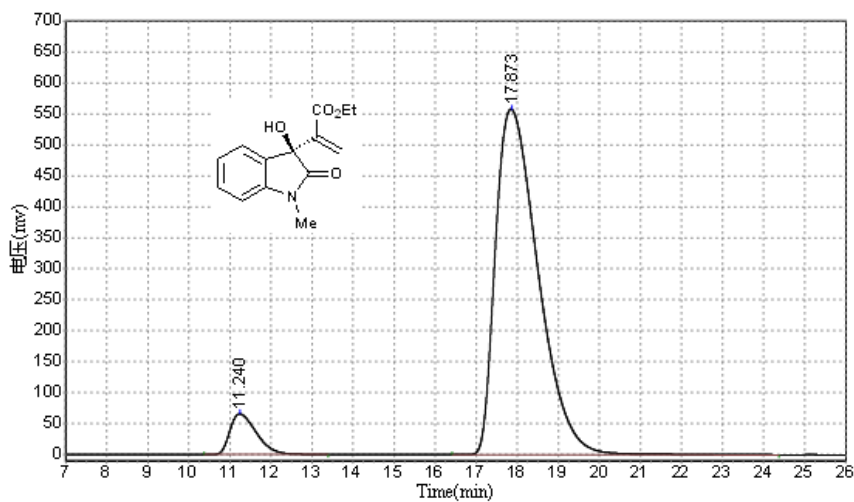

| Results  |         |          |            |              |          |
|----------|---------|----------|------------|--------------|----------|
| Peak No. | Peak ID | Ret Time | Height     | Area         | Conc.    |
| 1        |         | 11.240   | 65798.281  | 2988279.000  | 6.9069   |
| 2        |         | 17.873   | 558054.875 | 40276756.000 | 93.0931  |
| Total    |         |          | 623853.156 | 43265035.000 | 100.0000 |

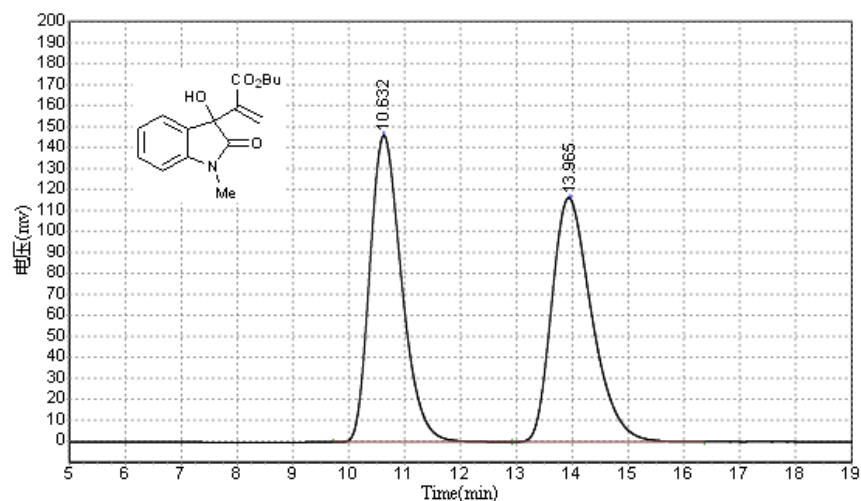

| Results  |         |          |            |              |          |
|----------|---------|----------|------------|--------------|----------|
| Peak No. | Peak ID | Ret Time | Height     | Area         | Conc.    |
| 1        |         | 10.632   | 145982.891 | 5790629.000  | 50.0634  |
| 2        |         | 13.965   | 116276.047 | 5775970.000  | 49.9366  |
| Total    |         |          | 262258.938 | 11566599.000 | 100.0000 |

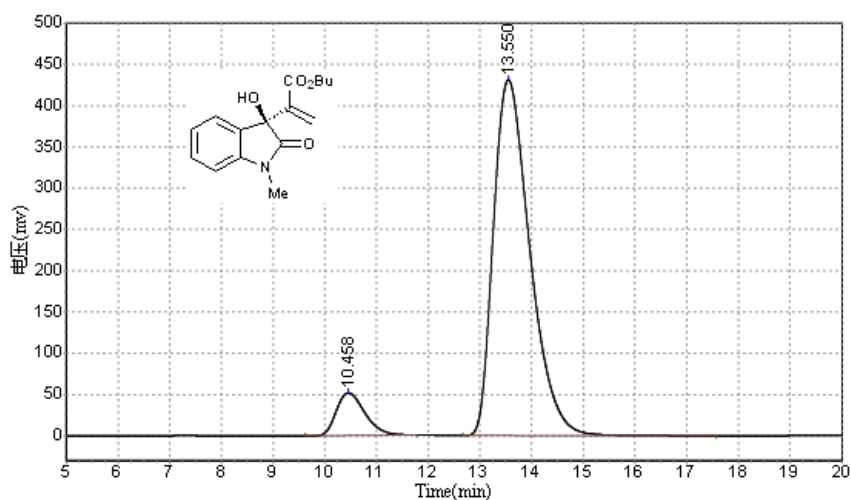

| Results  |         |          |            |              |          |
|----------|---------|----------|------------|--------------|----------|
| Peak No. | Peak ID | Ret Time | Height     | Area         | Conc.    |
| 1        |         | 10.458   | 51587.789  | 1965414.000  | 8.5192   |
| 2        |         | 13.550   | 431361.063 | 21104862.000 | 91.4808  |
| Total    |         |          | 482948.852 | 23070276.000 | 100.0000 |

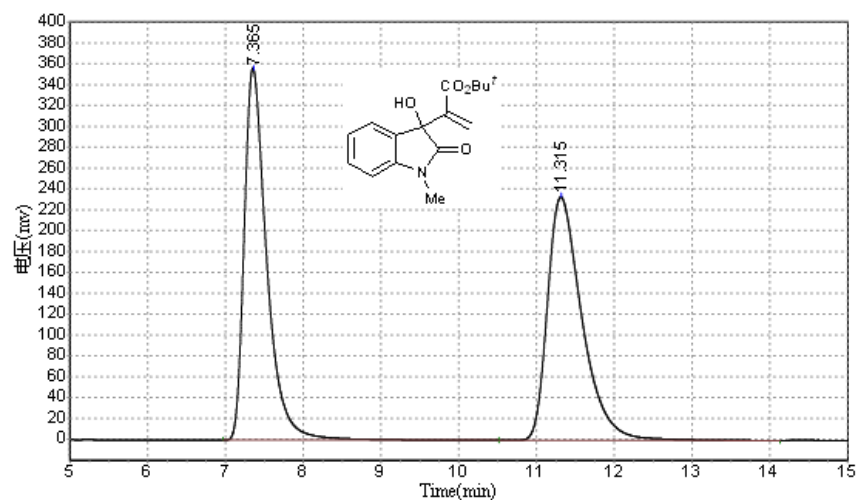

Results

| Peak No. | Peak ID | Ret Time | Height     | Area         | Conc.    |
|----------|---------|----------|------------|--------------|----------|
| 1        |         | 7.365    | 356304.313 | 7214100.500  | 50.0367  |
| 2        |         | 11.315   | 233157.313 | 7203517.000  | 49.9633  |
| Total    |         |          | 589461.625 | 14417617.500 | 100.0000 |

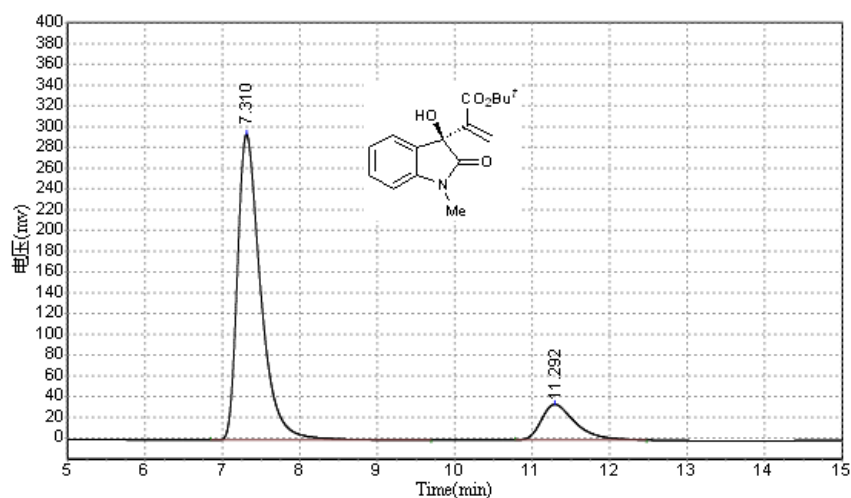

Results

| Peak No. | Peak ID | Ret Time | Height     | Area        | Conc.    |
|----------|---------|----------|------------|-------------|----------|
| 1        |         | 7.310    | 294581.031 | 6131392.500 | 85.4088  |
| 2        |         | 11.292   | 34323.359  | 1047482.500 | 14.5912  |
| Total    |         |          | 328904.391 | 7178875.000 | 100.0000 |



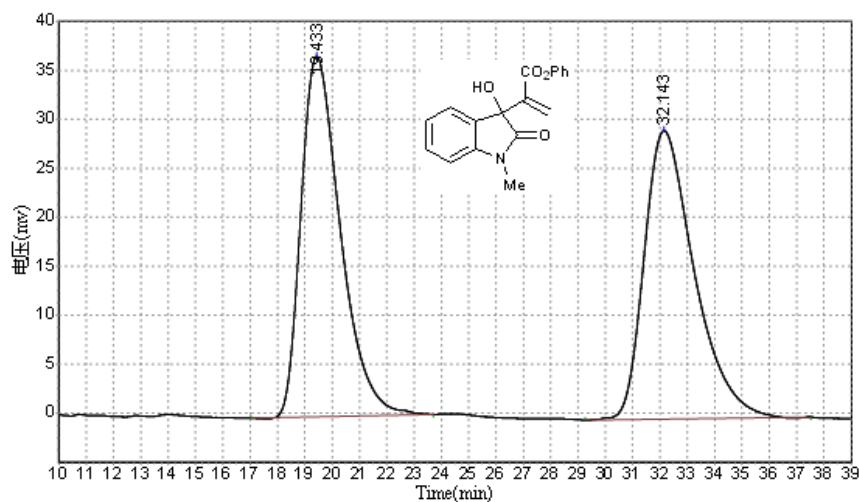

| Results  |         |          |           |             |          |
|----------|---------|----------|-----------|-------------|----------|
| Peak No. | Peak ID | Ret Time | Height    | Area        | Conc.    |
| 1        |         | 19.433   | 36786.387 | 3686438.750 | 49.6135  |
| 2        |         | 32.143   | 29453.410 | 3743873.000 | 50.3865  |
| Total    |         |          | 66239.797 | 7430311.750 | 100.0000 |

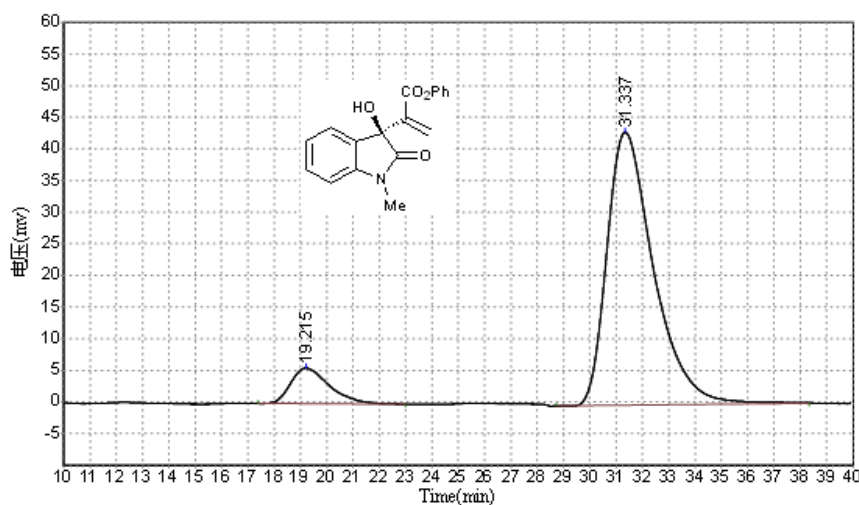

| Results  |         |          |           |             |          |
|----------|---------|----------|-----------|-------------|----------|
| Peak No. | Peak ID | Ret Time | Height    | Area        | Conc.    |
| 1        |         | 19.215   | 5641.313  | 577685.438  | 9.8129   |
| 2        |         | 31.337   | 43178.230 | 5309336.500 | 90.1871  |
| Total    |         |          | 48819.544 | 5887021.938 | 100.0000 |

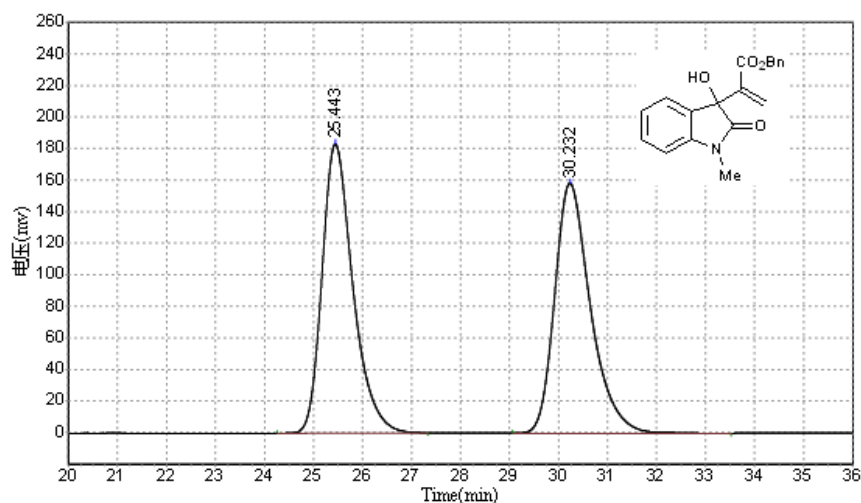

| Results  |         |          |            |              |          |
|----------|---------|----------|------------|--------------|----------|
| Peak No. | Peak ID | Ret Time | Height     | Area         | Conc.    |
| 1        |         | 25.443   | 183270.469 | 8014493.500  | 49.8892  |
| 2        |         | 30.232   | 158570.484 | 8050090.500  | 50.1108  |
| Total    |         |          | 341840.953 | 16064584.000 | 100.0000 |

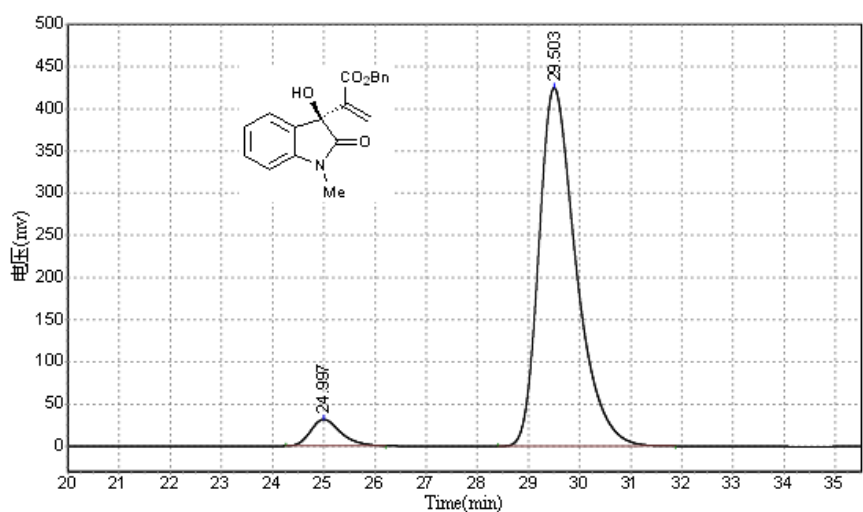

| Results  |         |          |            |              |          |
|----------|---------|----------|------------|--------------|----------|
| Peak No. | Peak ID | Ret Time | Height     | Area         | Conc.    |
| 1        |         | 24.997   | 31488.721  | 1290454.375  | 5.6808   |
| 2        |         | 29.503   | 425013.906 | 21425612.000 | 94.3192  |
| Total    |         |          | 456502.627 | 22716066.375 | 100.0000 |

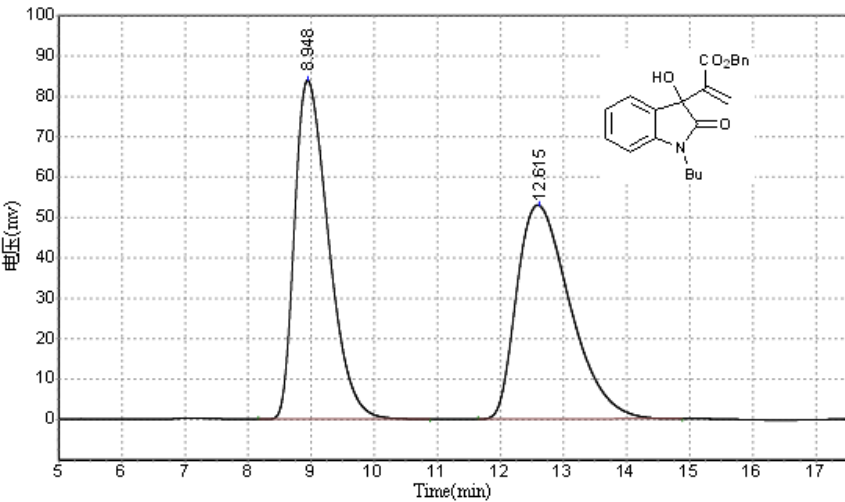

| Results  |         |          |            |             |          |
|----------|---------|----------|------------|-------------|----------|
| Peak No. | Peak ID | Ret Time | Height     | Area        | Conc.    |
| 1        |         | 8.948    | 83991.039  | 3139415.500 | 50.1080  |
| 2        |         | 12.615   | 52992.875  | 3125881.750 | 49.8920  |
| Total    |         |          | 136983.914 | 6265297.250 | 100.0000 |

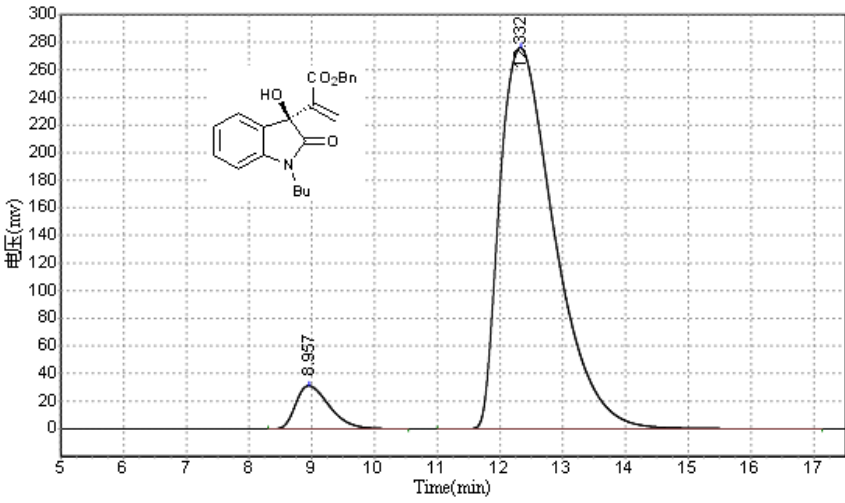

| Results  |         |          |            |              |          |
|----------|---------|----------|------------|--------------|----------|
| Peak No. | Peak ID | Ret Time | Height     | Area         | Conc.    |
| 1        |         | 8.957    | 31323.779  | 1172340.250  | 6.5375   |
| 2        |         | 12.332   | 276267.031 | 16760318.000 | 93.4625  |
| Total    |         |          | 307590.811 | 17932658.250 | 100.0000 |

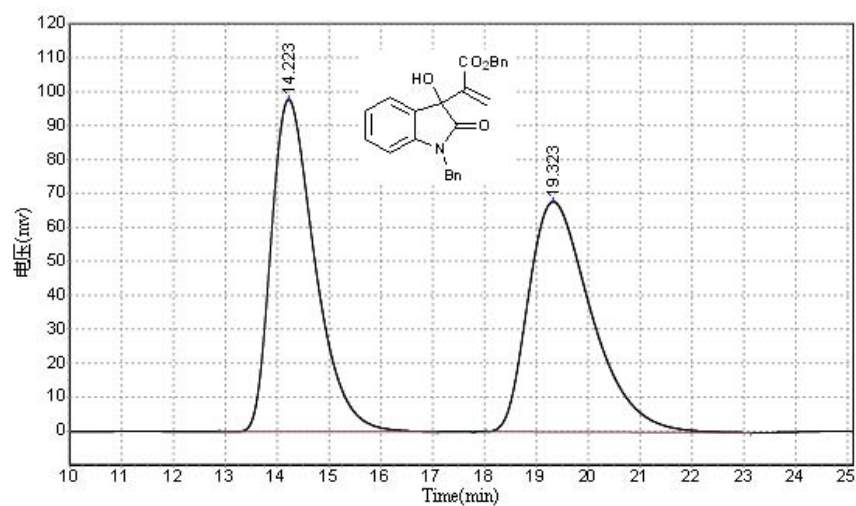

Results

| Peak No. | Peak ID | Ret Time | Height     | Area         | Conc.    |
|----------|---------|----------|------------|--------------|----------|
| 1        |         | 14.223   | 97976.578  | 5733076.000  | 50.0215  |
| 2        |         | 19.323   | 67902.172  | 5728135.500  | 49.9784  |
| Total    |         |          | 165878.750 | 11461211.500 | 100.0000 |

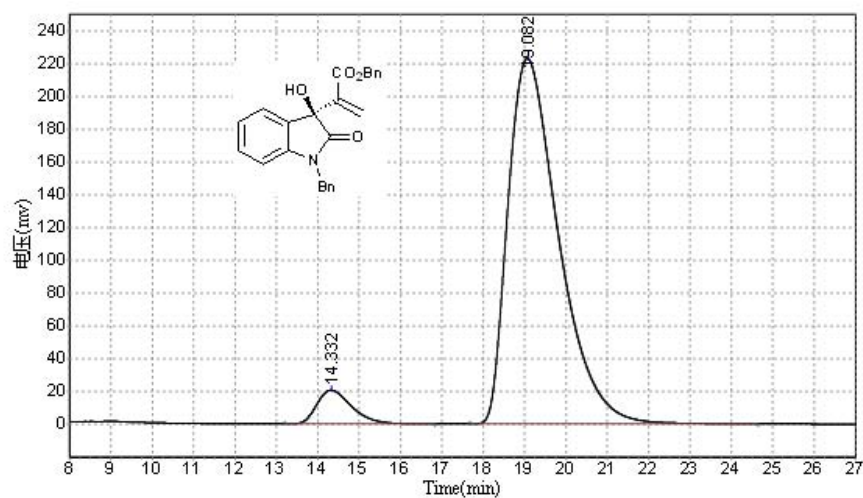

Results

| Peak No. | Peak ID | Ret Time | Height     | Area         | Conc.    |
|----------|---------|----------|------------|--------------|----------|
| 1        |         | 14.332   | 20620.146  | 1214902.500  | 6.0197   |
| 2        |         | 19.082   | 222999.141 | 18967322.000 | 93.9803  |
| Total    |         |          | 243619.287 | 20182224.500 | 100.0000 |

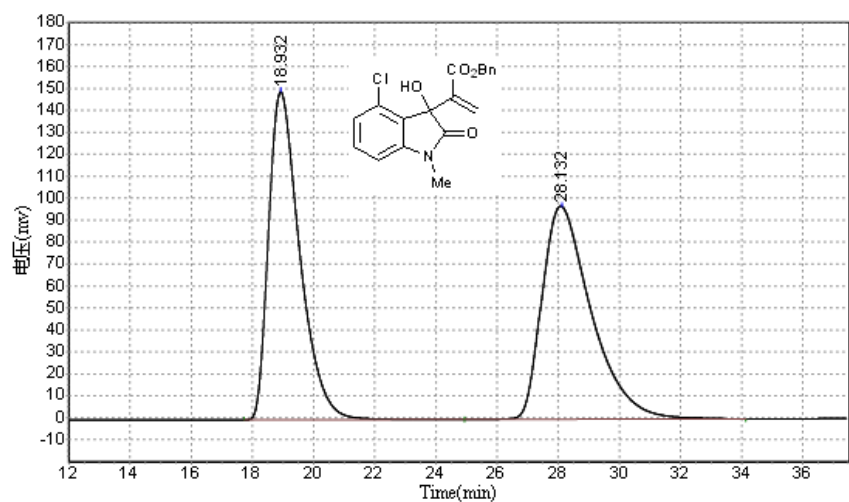

Results

| Peak No. | Peak ID | Ret Time | Height     | Area         | Conc.    |
|----------|---------|----------|------------|--------------|----------|
| 1        |         | 18.932   | 149358.656 | 10595534.000 | 49.2213  |
| 2        |         | 28.132   | 97143.359  | 10930805.000 | 50.7787  |
| Total    |         |          | 246502.016 | 21526339.000 | 100.0000 |

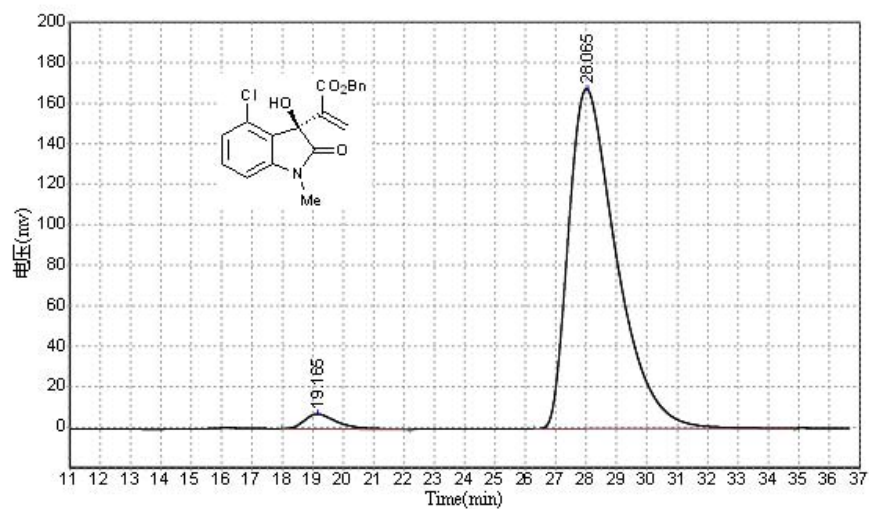

Results

| Peak No. | Peak ID | Ret Time | Height     | Area         | Conc.    |
|----------|---------|----------|------------|--------------|----------|
| 1        |         | 19.165   | 7469.940   | 569384.375   | 3.0068   |
| 2        |         | 28.065   | 167870.063 | 18367192.000 | 96.9932  |
| Total    |         |          | 175340.003 | 18936576.375 | 100.0000 |

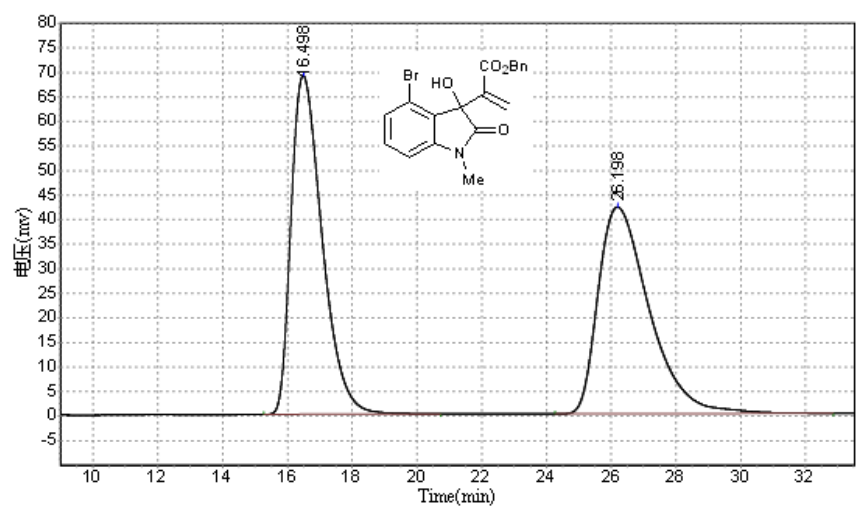

Results

| Peak No. | Peak ID | Ret Time | Height     | Area        | Conc.    |
|----------|---------|----------|------------|-------------|----------|
| 1        |         | 16.498   | 69075.609  | 4626191.500 | 50.0385  |
| 2        |         | 26.198   | 42061.504  | 4619074.000 | 49.9615  |
| Total    |         |          | 111137.113 | 9245265.500 | 100.0000 |

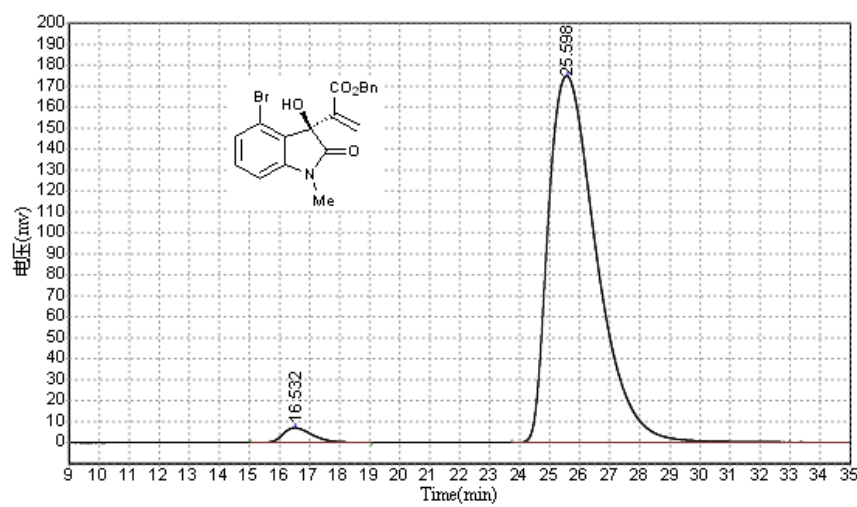

Results

| Peak No. | Peak ID | Ret Time | Height     | Area         | Conc.    |
|----------|---------|----------|------------|--------------|----------|
| 1        |         | 16.532   | 6973.661   | 471321.688   | 2.3800   |
| 2        |         | 25.598   | 174833.109 | 19332270.000 | 97.6200  |
| Total    |         |          | 181806.771 | 19803591.688 | 100.0000 |

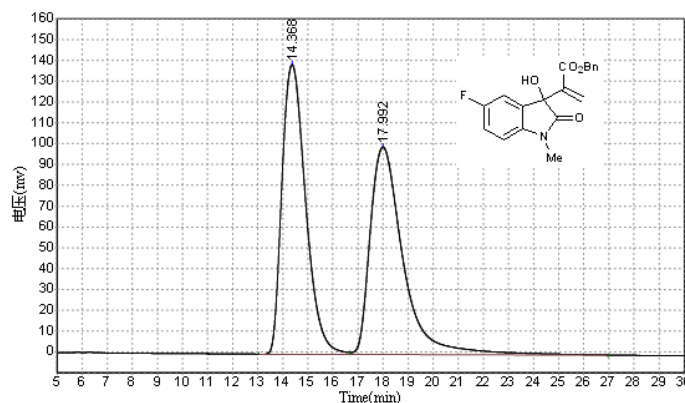

| Results  |         |          |            |              |          |
|----------|---------|----------|------------|--------------|----------|
| Peak No. | Peak ID | Ret Time | Height     | Area         | Conc.    |
| 1        |         | 14.368   | 139192.734 | 9099970.000  | 49.9913  |
| 2        |         | 17.992   | 99661.984  | 9103144.000  | 50.0087  |
| Total    |         |          | 238854.719 | 18203114.000 | 100.0000 |

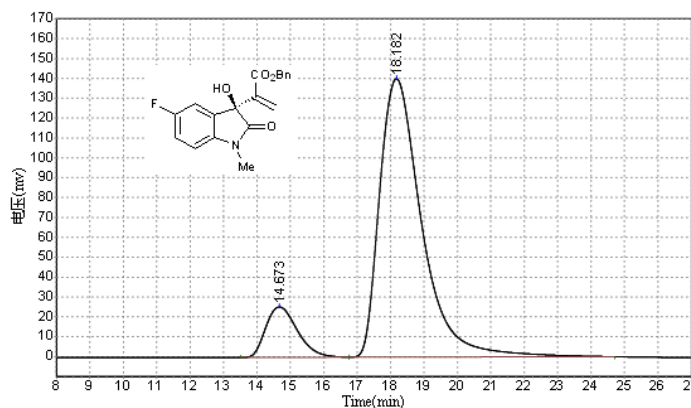

| Results  |         |          |            |              |          |
|----------|---------|----------|------------|--------------|----------|
| Peak No. | Peak ID | Ret Time | Height     | Area         | Conc.    |
| 1        |         | 14.673   | 25445.666  | 1672743.875  | 12.0224  |
| 2        |         | 18.182   | 140073.000 | 12240760.000 | 87.9775  |
| Total    |         |          | 165518.666 | 13913503.875 | 100.0000 |

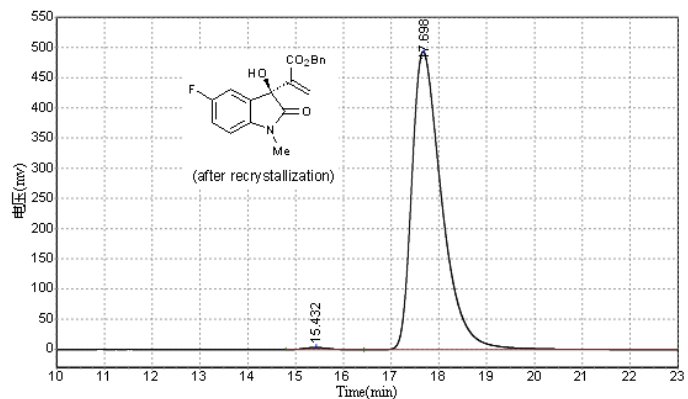

| Results  |         |          |            |              |          |
|----------|---------|----------|------------|--------------|----------|
| Peak No. | Peak ID | Ret Time | Height     | Area         | Conc.    |
| 1        |         | 15.432   | 3736.918   | 131980.906   | 0.6101   |
| 2        |         | 17.698   | 493424.844 | 21502210.000 | 99.3899  |
| Total    |         |          | 497161.762 | 21634190.906 | 100.0000 |

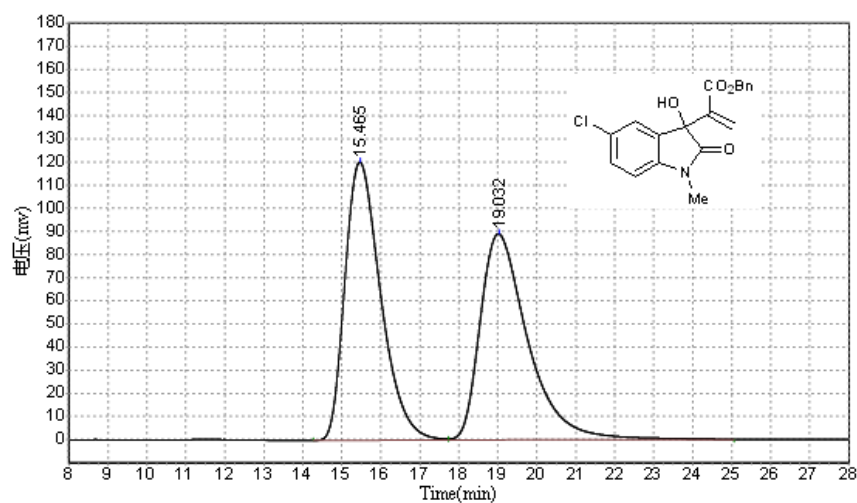

Results

| Peak No. | Peak ID | Ret Time | Height     | Area         | Conc.    |
|----------|---------|----------|------------|--------------|----------|
| 1        |         | 15.465   | 120231.055 | 7668881.000  | 50.1151  |
| 2        |         | 19.032   | 89148.063  | 7633644.000  | 49.8849  |
| Total    |         |          | 209379.117 | 15302525.000 | 100.0000 |

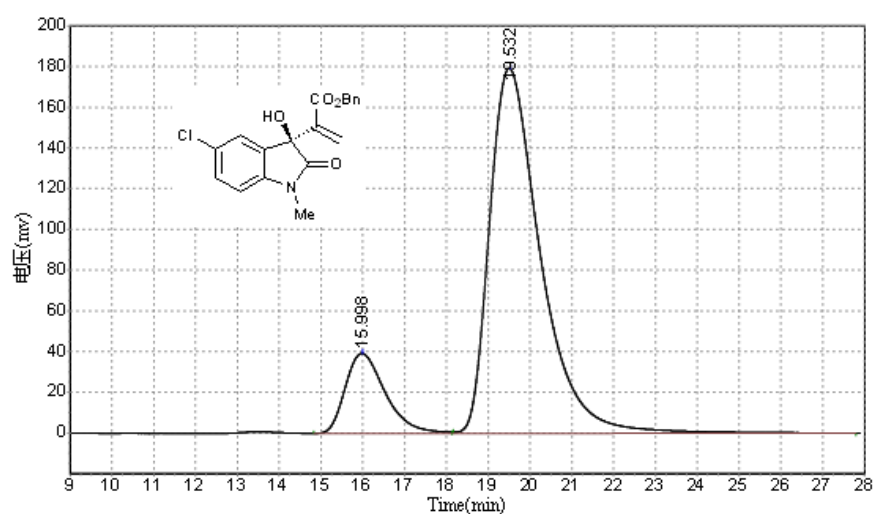

Results

| Peak No. | Peak ID | Ret Time | Height     | Area         | Conc.    |
|----------|---------|----------|------------|--------------|----------|
| 1        |         | 15.998   | 39354.973  | 2613811.250  | 14.6935  |
| 2        |         | 19.532   | 179372.469 | 15175131.000 | 85.3065  |
| Total    |         |          | 218727.441 | 17788942.250 | 100.0000 |



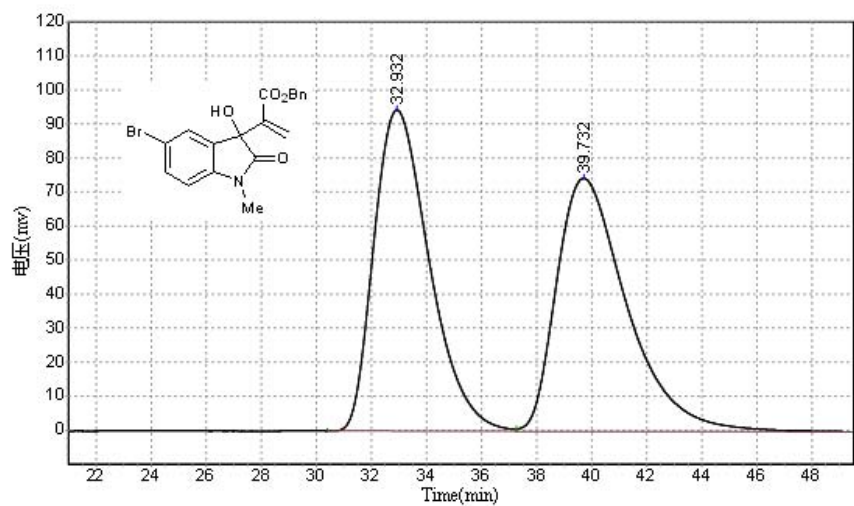

| Results  |         |          |            |              |          |
|----------|---------|----------|------------|--------------|----------|
| Peak No. | Peak ID | Ret Time | Height     | Area         | Conc.    |
| 1        |         | 32.932   | 94444.789  | 13230509.000 | 50.0118  |
| 2        |         | 39.732   | 74425.242  | 13224276.000 | 49.9882  |
| Total    |         |          | 168870.031 | 26454785.000 | 100.0000 |

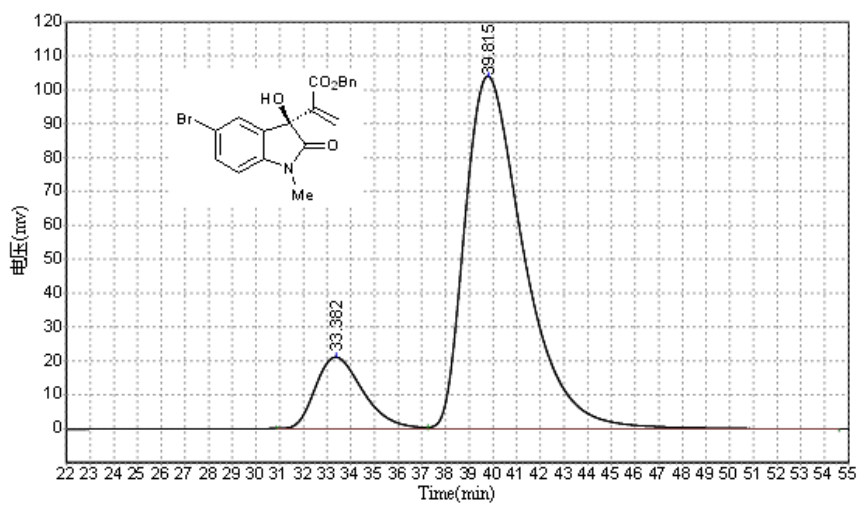

| Results  |         |          |            |              |          |
|----------|---------|----------|------------|--------------|----------|
| Peak No. | Peak ID | Ret Time | Height     | Area         | Conc.    |
| 1        |         | 33.382   | 21189.031  | 2959736.250  | 14.1061  |
| 2        |         | 39.815   | 104151.617 | 18022208.000 | 85.8939  |
| Total    |         |          | 125340.648 | 20981944.250 | 100.0000 |

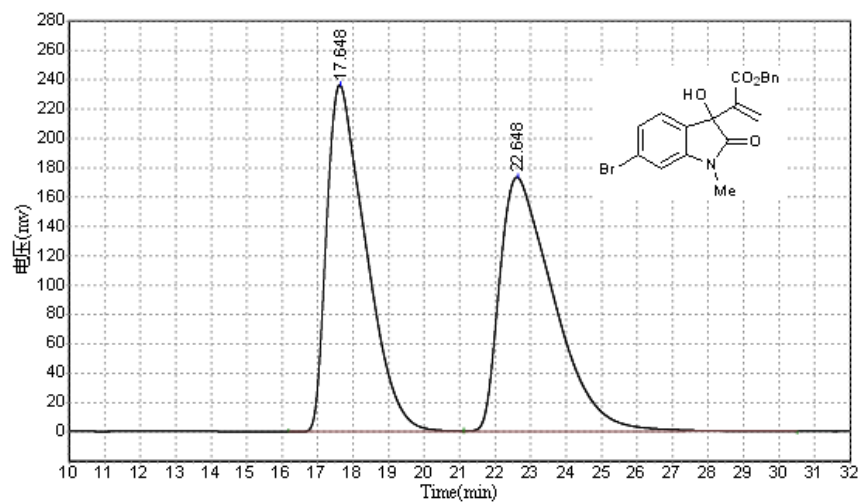

Results

| Peak No. | Peak ID | Ret Time | Height     | Area         | Conc.    |
|----------|---------|----------|------------|--------------|----------|
| 1        |         | 17.648   | 236411.328 | 18150110.000 | 49.5287  |
| 2        |         | 22.648   | 173465.969 | 18495516.000 | 50.4713  |
| Total    |         |          | 409877.297 | 36645626.000 | 100.0000 |

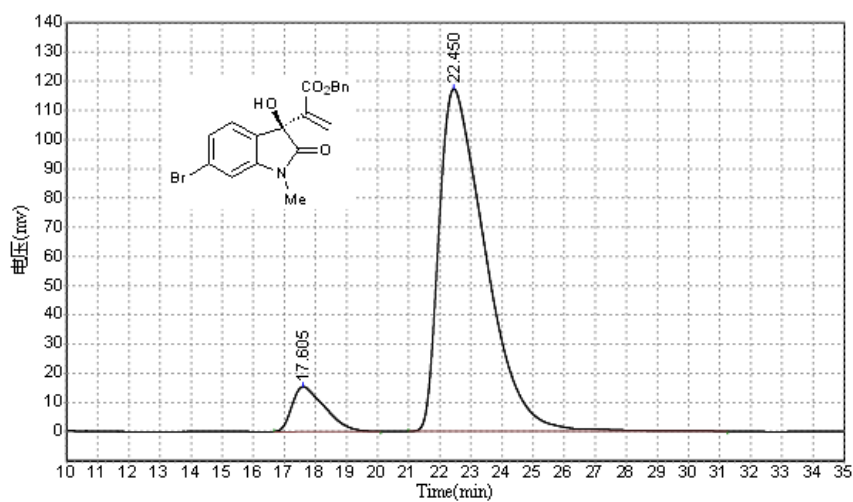

Results

| Peak No. | Peak ID | Ret Time | Height     | Area         | Conc.    |
|----------|---------|----------|------------|--------------|----------|
| 1        |         | 17.605   | 15442.905  | 1125423.875  | 8.4687   |
| 2        |         | 22.450   | 117371.563 | 12163828.000 | 91.5313  |
| Total    |         |          | 132814.468 | 13289251.875 | 100.0000 |

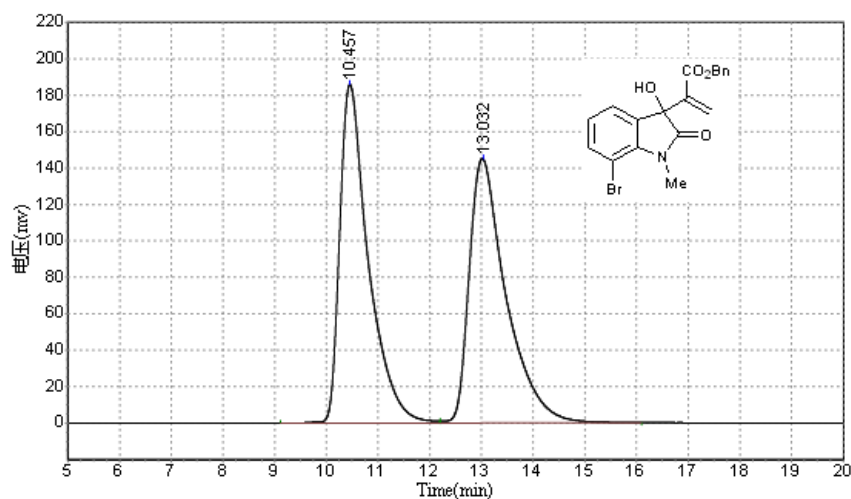

Results

| Peak No. | Peak ID | Ret Time | Height     | Area         | Conc.    |
|----------|---------|----------|------------|--------------|----------|
| 1        |         | 10.457   | 186050.813 | 7147039.000  | 49.7175  |
| 2        |         | 13.032   | 145308.656 | 7228251.500  | 50.2825  |
| Total    |         |          | 331359.469 | 14375290.500 | 100.0000 |

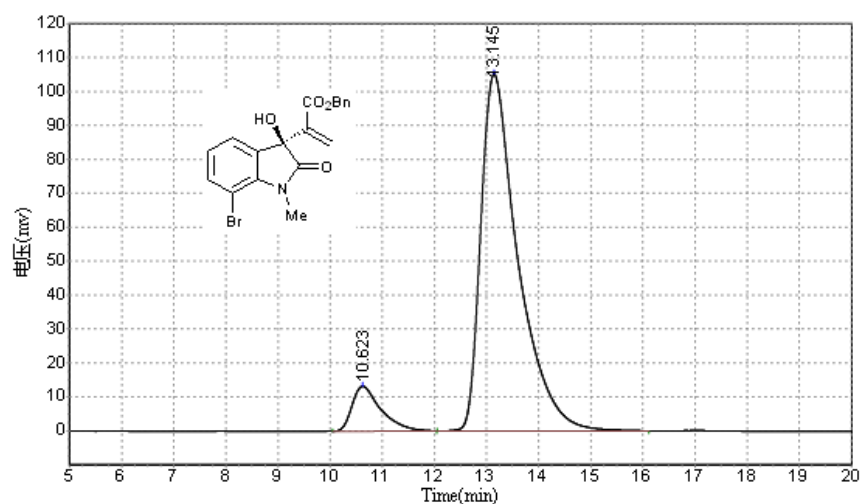

Results

| Peak No. | Peak ID | Ret Time | Height     | Area        | Conc.    |
|----------|---------|----------|------------|-------------|----------|
| 1        |         | 10.623   | 13278.778  | 507845.125  | 8.8864   |
| 2        |         | 13.145   | 105208.398 | 5207043.000 | 91.1136  |
| Total    |         |          | 118487.177 | 5714888.125 | 100.0000 |

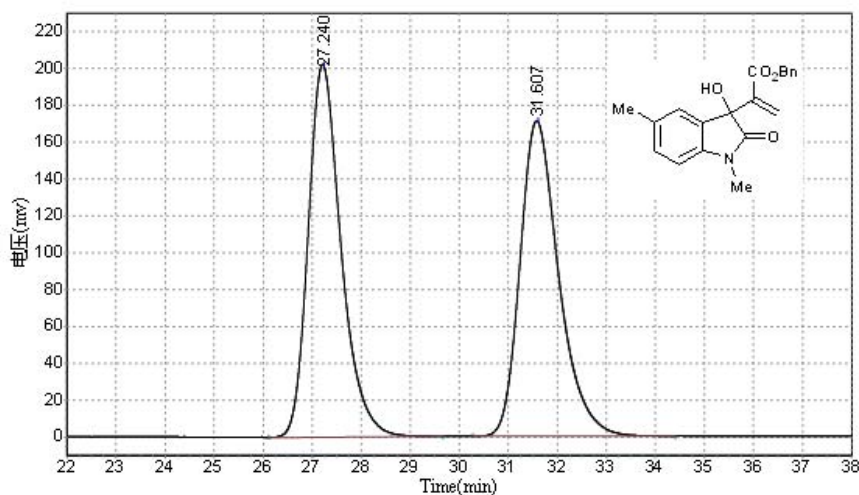

| Results  |         |          |            |              |          |
|----------|---------|----------|------------|--------------|----------|
| Peak No. | Peak ID | Ret Time | Height     | Area         | Conc.    |
| 1        |         | 27.240   | 202082.938 | 9436402.000  | 50.0973  |
| 2        |         | 31.607   | 171120.141 | 9399759.000  | 49.9027  |
| Total    |         |          | 373203.078 | 18836161.000 | 100.0000 |

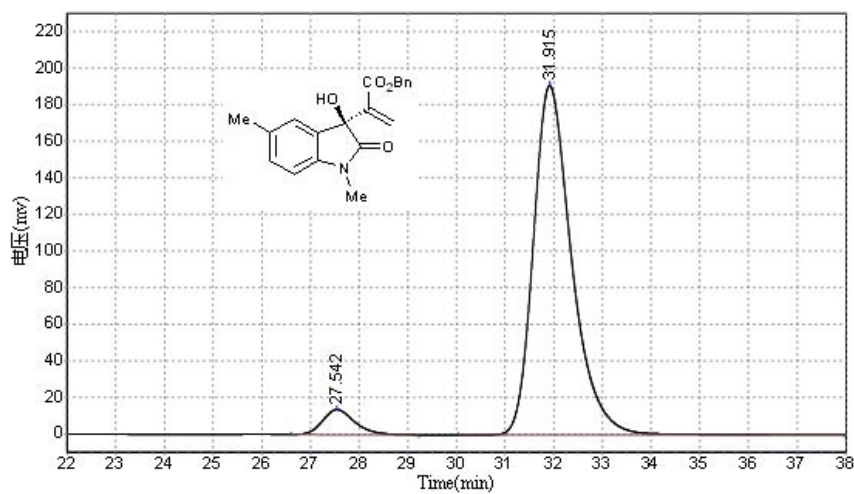

| Results  |         |          |            |              |          |
|----------|---------|----------|------------|--------------|----------|
| Peak No. | Peak ID | Ret Time | Height     | Area         | Conc.    |
| 1        |         | 27.542   | 13647.647  | 623203.250   | 5.6261   |
| 2        |         | 31.915   | 191149.703 | 10453784.000 | 94.3739  |
| Total    |         |          | 204797.351 | 11076987.250 | 100.0000 |

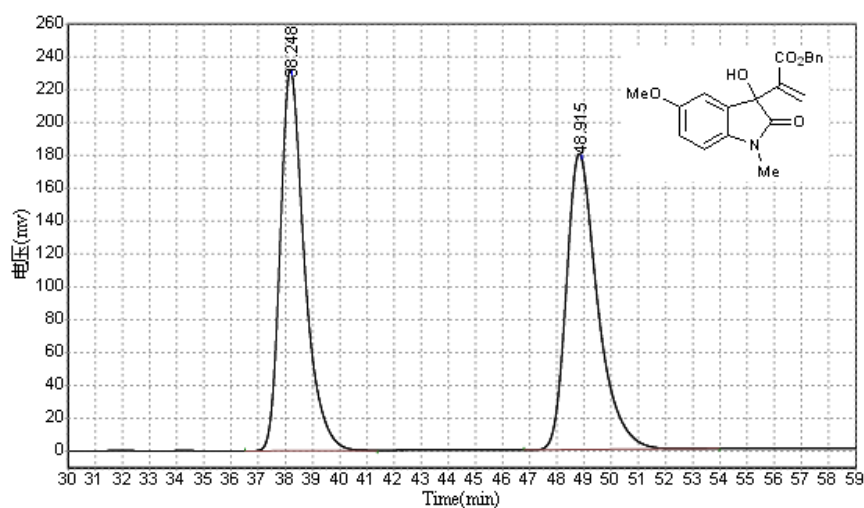

Results

| Peak No. | Peak ID | Ret Time | Height     | Area         | Conc.    |
|----------|---------|----------|------------|--------------|----------|
| 1        |         | 38.248   | 230748.391 | 14378258.000 | 49.8685  |
| 2        |         | 48.915   | 179338.297 | 14454069.000 | 50.1315  |
| Total    |         |          | 410086.688 | 28832327.000 | 100.0000 |

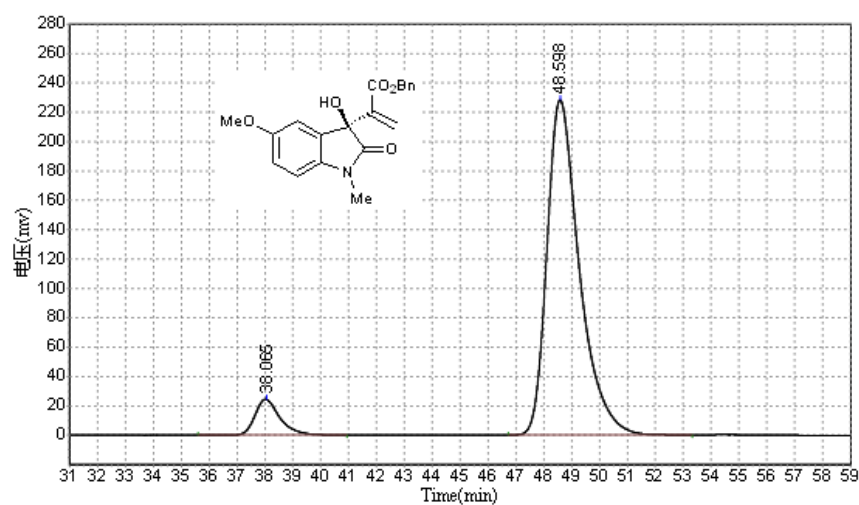

Results

| Peak No. | Peak ID | Ret Time | Height     | Area         | Conc.    |
|----------|---------|----------|------------|--------------|----------|
| 1        |         | 38.065   | 24384.520  | 1508491.000  | 7.5418   |
| 2        |         | 48.598   | 228090.359 | 18493348.000 | 92.4582  |
| Total    |         |          | 252474.879 | 20001839.000 | 100.0000 |

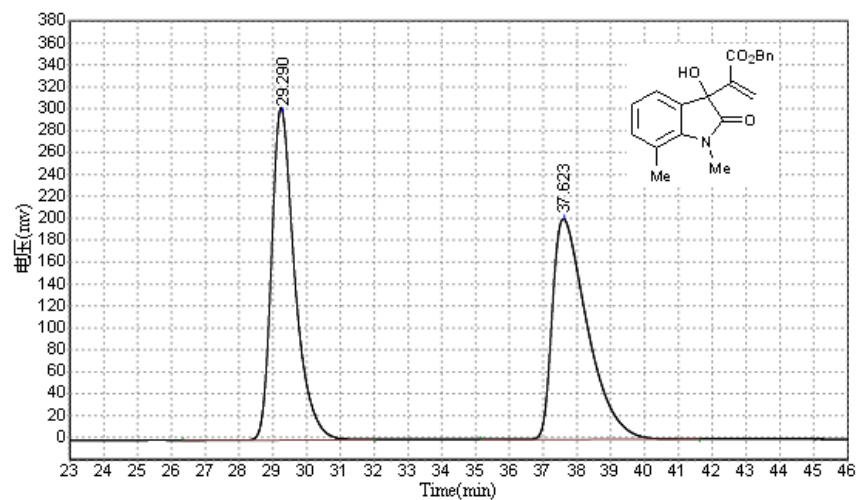

| Results  |         |          |            |              |          |
|----------|---------|----------|------------|--------------|----------|
| Peak No. | Peak ID | Ret Time | Height     | Area         | Conc.    |
| 1        |         | 29.290   | 302148.906 | 14462515.000 | 49.9029  |
| 2        |         | 37.623   | 201372.906 | 14518802.000 | 50.0971  |
| Total    |         |          | 503521.813 | 28981317.000 | 100.0000 |

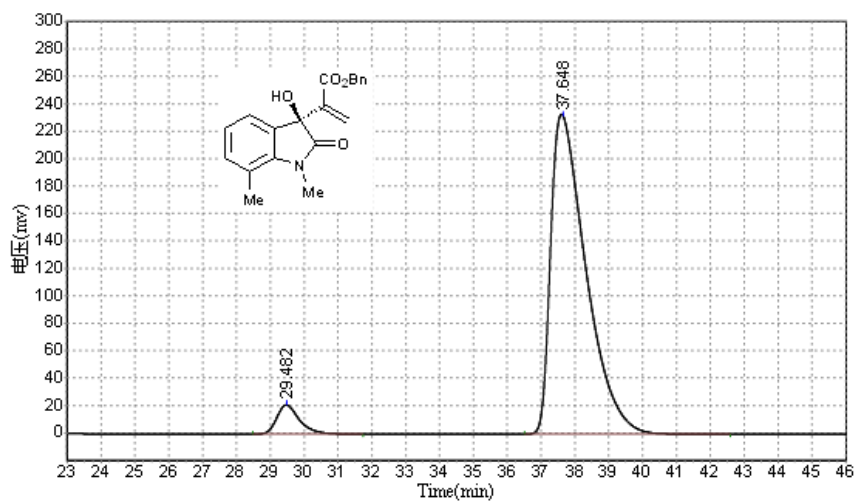

| Results  |         |          |            |              |          |
|----------|---------|----------|------------|--------------|----------|
| Peak No. | Peak ID | Ret Time | Height     | Area         | Conc.    |
| 1        |         | 29.482   | 21326.793  | 1004682.563  | 5.6207   |
| 2        |         | 37.648   | 233115.438 | 16869930.000 | 94.3793  |
| Total    |         |          | 254442.230 | 17874612.563 | 100.0000 |

### 7. Absolute Configuration and X-Ray Analysis Data of **6m**

The crystal data of **6m** have been deposited in CCDC with number 856997.

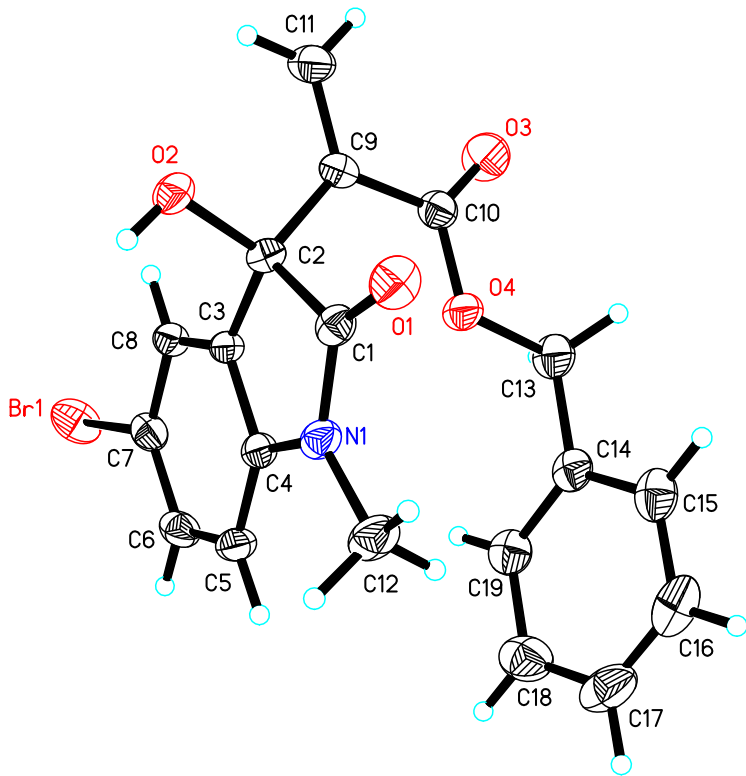

Table 1. Crystal data and structure refinement for cd211247.

|                             |                                                                                                                   |
|-----------------------------|-------------------------------------------------------------------------------------------------------------------|
| Identification code         | cd211247                                                                                                          |
| Empirical formula           | C <sub>19</sub> H <sub>16</sub> Br N O <sub>4</sub>                                                               |
| Formula weight              | 402.24                                                                                                            |
| Temperature                 | 293(2) K                                                                                                          |
| Wavelength                  | 0.71073 Å                                                                                                         |
| Crystal system, space group | Orthorhombic, P2(1)2(1)2(1)                                                                                       |
| Unit cell dimensions        | a = 7.8115(7) Å    alpha = 90 deg.<br>b = 11.8206(11) Å    beta = 90 deg.<br>c = 18.4780(17) Å    gamma = 90 deg. |
| Volume                      | 1706.2(3) Å <sup>3</sup>                                                                                          |
| Z, Calculated density       | 4, 1.566 Mg/m <sup>3</sup>                                                                                        |
| Absorption coefficient      | 2.433 mm <sup>-1</sup>                                                                                            |

|                                   |                                             |
|-----------------------------------|---------------------------------------------|
| F(000)                            | 816                                         |
| Crystal size                      | 0.369 x 0.311 x 0.257 mm                    |
| Theta range for data collection   | 2.05 to 26.00 deg.                          |
| Limiting indices                  | -9<=h<=7, -14<=k<=14, -21<=l<=22            |
| Reflections collected / unique    | 9218 / 3335 [R(int) = 0.0338]               |
| Completeness to theta = 26.00     | 100.0 %                                     |
| Absorption correction             | Empirical                                   |
| Max. and min. transmission        | 1.00000 and 0.28748                         |
| Refinement method                 | Full-matrix least-squares on F <sup>2</sup> |
| Data / restraints / parameters    | 3335 / 0 / 229                              |
| Goodness-of-fit on F <sup>2</sup> | 1.069                                       |
| Final R indices [I>2sigma(I)]     | R1 = 0.0387, wR2 = 0.0951                   |
| R indices (all data)              | R1 = 0.0463, wR2 = 0.0989                   |
| Absolute structure parameter      | 0.002(12)                                   |
| Extinction coefficient            | 0.128(4)                                    |
| Largest diff. peak and hole       | 0.959 and -0.490 e.A <sup>-3</sup>          |
